1 **An assessment of adult mosquito collection techniques for studying species**  
2 **abundance and diversity in Maferinyah, Guinea**

3 Cintia Cansado-Utrilla<sup>1</sup>, Claire L. Jeffries<sup>1</sup>, Mojca Kristan<sup>1</sup>, Victor A. Brugman<sup>1</sup>, Patrick  
4 Heard<sup>1</sup>, Gnepou Camara<sup>2</sup>, Moussa Sylla<sup>2</sup>, Abdoul H. Beavogui<sup>2</sup>, Louisa A. Messenger<sup>1,3,4</sup> &  
5 Thomas Walker<sup>1\*</sup>.

6

7 <sup>1</sup>Department of Disease Control, London School of Hygiene and Tropical Medicine, Keppel  
8 Street, London WC1E 7HT, UK

9 <sup>2</sup>Centre de Formation et de Recherche en Sante Rurale de Maferinyah, Conakry, Republic  
10 of Guinea

11 <sup>3</sup>Entomology Branch, Centers for Disease Control and Prevention, Atlanta, Georgia, 30329-  
12 4027, USA

13 <sup>4</sup>American Society for Microbiology, 1752 N Street, NW Washington DC, 20036, United  
14 States of America

15 \*Corresponding author. Tel.: +44 (0) 2079272807; E-mail: [thomas.walker@lshtm.ac.uk](mailto:thomas.walker@lshtm.ac.uk).

16

17 Note: Supplementary data associated with this article.

18

19

20

21

22

23

24 **ABSTRACT**

25 Background: Guinea is a West African country with a high prevalence of vector-borne  
26 diseases where few entomological studies have been undertaken. Although several  
27 mosquito collection methods are routinely used for surveillance in vector control  
28 programmes, they target different behaviours causing bias in species diversity and  
29 abundance. Given the paucity of mosquito trap data in West Africa, we compared the  
30 performance of five trap-lure combinations and Human Landing Catches (HLCs) in Guinea.

31 Methods: Five mosquito traps were compared in a 5x5 Latin Square design for 15 days in  
32 three villages in Guinea between June and July 2018. CDC light traps, BG sentinel 2 traps  
33 (with BG and MB5 lures), gravid traps and Stealth traps were deployed for 24-hour intervals  
34 with mosquitoes collected every 12 hours (day and night collections). HLCs were also  
35 performed for 15 nights. A Generalised Linear Mixed Model was applied to compare the  
36 effect of the traps, sites and collection times on the mosquito abundance. Species  
37 identification was confirmed using PCR-based analysis and Sanger sequencing.

38 Results: In total, 10,610 mosquitoes were captured across all five traps. Significantly more  
39 mosquitoes ( $P < 0.005$ ) were collected by Stealth traps (7,096) compared to the rest of the  
40 traps. Stealth traps and BG sentinel 2 traps were the best at capturing *An. gambiae* and *Ae.*  
41 *aegypti* mosquitoes respectively. HLCs captured predominantly *An. coluzzii* (41%) and  
42 hybrids of *An. gambiae* s.s. / *An. coluzzii* (36%) in contrast to the five adult traps, which  
43 captured predominantly *An. melas* (83%). Senguelen (rural) presented the highest  
44 abundance of mosquitoes and overall diversity in comparison with Fandie (semi-rural) and  
45 Maferinyah Centre One (semi-urban). To our knowledge, four species are reported for the  
46 first time in Guinea.

47 Conclusions: Stealth traps presented the best performance overall, suggesting that this trap  
48 may play an important role for mosquito surveillance in Guinea and similar sites in West  
49 Africa. We recommend the incorporation of molecular tools in entomological studies since it

50 has helped to reveal, together with morphological identification, the presence of 25 mosquito  
51 species in this area.

52 Key words: BG sentinel 2 trap, CDC light trap, Gravid Trap, Guinea, Mosquito, Stealth trap.

## 53 **BACKGROUND**

54 Control programmes which target malaria and other vector-borne diseases need to be  
55 specific to the country or region in which they are implemented. In order to choose the best  
56 intervention(s), it is essential to know which mosquito species are both present, and  
57 transmitting human pathogens in a given area. For example, the primary vectors of malaria  
58 in Africa display primarily endophagic and endophilic behaviour and therefore can be  
59 targeted by interventions such as Indoor Residual Spraying (IRS) or through the use of  
60 Long-Lasting Insecticidal Nets (LLINs). Despite primary vectors contributing to the majority  
61 of the transmission of mosquito-borne diseases, secondary vector species can play an  
62 essential role in maintaining residual transmission (1). However, secondary malaria vectors  
63 that display exophagic and/or exophilic behaviour may not be affected by interventions  
64 focused on the primary vectors. Additionally, climate change, deforestation or the reduction of  
65 primary vectors through vector control strategies may result in the increased dominance and  
66 relative importance of secondary vectors (2,3). Therefore, control programmes that do not  
67 target secondary vectors may not be completely successful (4). In order to monitor the  
68 effectiveness of a control programme, mosquito abundance and composition before and  
69 after intervention deployment can be determined by undertaking entomological surveys.

70 Different collection methods are available to collect entomological data, among which  
71 Human Landing Catches (HLCs) are the gold standard method for collecting human-biting  
72 mosquito species (5). However, HLCs only collect anthropophilic, host-seeking mosquito  
73 species. Therefore, additional methods of adult mosquito sampling can be used indoors and  
74 outdoors to exploit different aspects of mosquito feeding and resting behaviour including  
75 anthropophily, zoophily, endophily, exophily, endophagy and exophagy. However, trap

76 comparison studies can be problematic as each trap exploits a different mosquito behaviour.  
77 Factors that can influence the abundance, species composition, female physiological status  
78 (gravid, bloodfed, etc.) and infection prevalence of the collection include trap design, use of  
79 attractants and location (6–8). Therefore, it is important to minimise trap bias to decide which  
80 one is most appropriate for mosquito monitoring and surveillance objectives in a given  
81 location. Although some traps have been compared to HLCs in East Africa (6), to our  
82 knowledge only a few studies have compared the performance of mosquito traps in West  
83 Africa (Ghana (9) and Senegal (8)).

84 Guinea is a West African country with a high prevalence of vector-borne diseases (10,11)  
85 where more than 55% of the population is affected by poverty (12). Major outbreaks of  
86 human diseases include a yellow fever virus (YFV) outbreak in 2000 (13) where *Aedes* (*Ae.*)  
87 *aegypti*, the major YFV vector in urban areas, was not found in the rural areas (13),  
88 suggesting other mosquito species were likely involved in transmission. Despite significant  
89 transmission of malaria, lymphatic filariasis and sporadic outbreaks of arboviruses, relatively  
90 few medical entomological studies to date have been undertaken in Guinea (14–22).  
91 Therefore, there is a need to undertake entomological surveys using diverse collection  
92 methods to determine the most appropriate mosquito trapping methods to use for  
93 surveillance.

94 We compared the performance of several adult trapping methods to determine both  
95 mosquito species abundance and diversity in Maferinyah sub-prefecture, Guinea. To our  
96 knowledge, only larval collections, pyrethroid spray catches, exit traps, aspirators, HLCs and  
97 CDC light traps have been used in Guinea to collect mosquitoes (16,19,22–24). Thus, we  
98 selected gravid traps, Stealth traps and CDC light traps, and BG sentinel 2 traps with two  
99 different lures (BG and MB5) in comparison with HLCs to capture the highest diversity of  
100 mosquito species. The abundance and diversity of mosquito species captured was assessed  
101 and the results of this entomological survey are discussed in the context of mosquito  
102 surveillance and vector control strategies.

## 103 **METHODS**

### 104 **Study sites**

105 In order to compare mosquito diversity between rural, semi-rural and semi-urban locations,  
106 three sites were selected for mosquito collections using traps: Senguelen, Fandie and  
107 Maferinyah Centre One respectively (Figure 1). The corresponding coordinates in decimal  
108 degrees of latitude and longitude are as follows: Senguelen (9.41, -13.37), Fandie (9.53, -  
109 13.24) and Maferinyah Centre One (9.54, -13.28). Human Landing Catches were performed  
110 in Senguelen, Maferinyah Centre One and Yindi, a rural village with coordinates 9.40, -  
111 13.32. All sites are located in the Maferinyah sub-prefecture, Forecariah prefecture, in the  
112 region of Kindia. For the trap comparison, five sampling locations were chosen within each  
113 site, with a minimum of 50 metres between each one. The coordinates of sampling locations  
114 were recorded using GPS (eTrex 10, Garmin). A description of sampling locations and  
115 coordinates is given in Table S1. Mosquito collections were undertaken between June and  
116 July 2018.

### 117 **Mosquito sampling**

118 BG sentinel 2 traps (BG2) (Biogents, Regensburg, Germany), CDC light traps (LT) (John W.  
119 Hock, Gainesville, Florida, USA), Reiter-Cummings gravid traps (GT) (BioQuip, Compton,  
120 California, USA) and Stealth traps (ST) (John W. Hock, Gainesville, Florida, USA) were used  
121 for mosquito collections. BG-lure (NH<sub>3</sub>, lactic acid and hexanoic acid) or BG-MB5 lure (NH<sub>3</sub>,  
122 lactic acid, tetradecanoic acid, 3-methyl-1-butanol and butan-1-amine) (Biogents,  
123 Regensburg, Germany) were used with BG2 traps (BG2-BG and BG2-MB5 respectively).  
124 The ST is a novel trap which has eight ultraviolet LEDs, in addition to an incandescent light,  
125 which attracts host-seeking female mosquitoes that get trapped in a collection bag after  
126 passing through a fan. It is also black and camouflage in colour, and it is small in size,  
127 making it easy to carry and use in the field. All these features make the Stealth trap different  
128 from the CDC light trap, although the way they work is similar. The incandescent light of the

129 LT was programmed to be operational for 24 hours whereas the ultraviolet and incandescent  
130 lights of the ST turned off automatically from 07:00 to 19:00. Carbon dioxide (CO<sub>2</sub>) was used  
131 as an attractant for LT and ST for the duration of the 24 hours, directed into the vicinity of  
132 trap inlets using plastic containers. It was prepared by mixing 280g of sugar and 5g of yeast  
133 in 500mL of water (25). In each of the three sites, water collected locally from shallow sunlit  
134 ponds was used for the GT. A 5 x 5 Latin Square design was applied in each site (Figure 2).  
135 The traps were placed in five sampling locations of one site at 19:00. Mosquitoes were  
136 collected every 12 hours and the traps were rotated to the next sampling point every 24  
137 hours, so two collections – day and night – per trap per sampling point were obtained (Figure  
138 2). Fifteen Human Landing Catches (HLCs) were undertaken over 15 nights alongside  
139 mosquito trapping – on different days - five nights in each location. Landing mosquitoes were  
140 collected outdoors from 20:00 to 02:00 using manual aspirators in teams of 5 to 6 volunteers  
141 per night.

#### 142 **Collection of environmental data**

143 Temperature and relative humidity were recorded at each sampling point every 5 minutes  
144 using EL-USB-2 data loggers (Lascar Electronics, UK) and averaged over the 12-hour  
145 period of each collection. Presence or absence of rain was recorded by field workers (Figure  
146 S1).

#### 147 **Identification of mosquitoes**

148 Mosquitoes collected from traps and HLCs were morphologically identified using keys (26–  
149 28) and stored in RNAlater at -80°C. A subsample of 370 mosquitoes collected using traps  
150 was selected for molecular identification. At least one specimen of every morphologically  
151 identified species and unidentified specimens from each of the five traps and each of the  
152 three trapping locations were chosen for sequencing to confirm the identification. Genomic  
153 DNA was initially extracted from individual males morphologically identified as *Culex* (*Cx.*)  
154 using DNeasy-96 extraction kits (QIAGEN, Manchester, UK) according to the manufacturer's

155 protocol with minor modifications. RNA extraction was undertaken on individual females  
156 morphologically identified as within the *Aedes*, *Anopheles* (*An.*) and *Eretmapodites* genera  
157 using RNeasy-96 extraction kits (QIAGEN, Manchester, UK) according to the manufacturer's  
158 protocol with minor modifications. RNA was reverse transcribed into complementary DNA  
159 (cDNA) using a High Capacity cDNA Reverse Transcription kit (Applied Biosystems,  
160 Warrington, UK). A final volume of 20µL contained 10µL RNA, 2µL 10X RT buffer, 0.8µL  
161 25X dNTP (100 mM), 2µL 10X random primers, 1µL reverse transcriptase and 4.2µL  
162 nuclease-free water. Conditions were 25°C for 10min, 37°C for 120min and 85°C for 5min.

163 Different PCR assays were carried out depending on the genus. For discrimination of  
164 species of the *An. gambiae* complex, an end-point PCR to detect the *SINE200* insertion (29)  
165 and a multiplex PCR for amplification of an Intergenic Spacer (IGS) region (30) were used.  
166 Amplification and sequencing of regions of the *COI* gene (31) and *ITS2* gene (32) was used  
167 for confirmation of *An. squamosus* and the rest of the *Anopheles* species collected,  
168 respectively. For identification of *Culex* species, amplification and sequencing of an  
169 alternative fragment of the *COI* gene (33) was used. Since this specific fragment did not  
170 provide enough variability to discriminate between *Cx. quinquefasciatus* and *Cx. p. pipiens*,  
171 an ACE multiplex end-point PCR assay (34) was used for discrimination. For identification of  
172 *Aedes* and *Eretmapodites*, in addition to confirmatory testing of *Cx. cf. sitiens* samples,  
173 amplification and sequencing of a further *COI* gene fragment (35) was undertaken. Primers  
174 and conditions of all PCR assays are described in Table S2.

175 PCR assays were performed in a Bio-Rad T100 thermocycler and PCR products were  
176 visualised in precast Invitrogen 2% agarose E-gel cartridges (containing SYBR gold stain) in  
177 an E-Gel iBase power system (Invitrogen, Warrington, UK) using a 100bp DNA ladder (NEB)  
178 for product size analysis. For barcoding, PCR products were submitted to Source  
179 BioScience (Source BioScience Plc, Nottingham, UK) for PCR reaction clean-up, followed by  
180 Sanger sequencing to generate both forward and reverse reads. Sequencing analysis was  
181 carried out in MEGA7 (36) as follows. Both chromatograms (forward and reverse traces)

182 from each sample were manually checked, edited, and trimmed as required, followed by  
183 alignment with ClustalW and checking to produce consensus sequences. Consensus  
184 sequences were used to perform nucleotide BLAST (NCBI) database queries (37,38). Full  
185 consensus sequences were submitted to Genbank and assigned accession numbers XXX-  
186 YYY. Confirmation of species was considered complete for sequences with an identity to a  
187 particular species given by BLAST of greater or equal to 98%, and where no other species  
188 also gave identities at this level.

## 189 **Data analysis**

190 Functions “filter”, “select”, “group\_by”, “n” and “summarise” from package dplyr (39) were  
191 used in RStudio (40) for data handling. A Generalised Linear Mixed Model (GLMM) with the  
192 Negative Binomial distribution was applied to the data with the function “glmer.nb” from  
193 package lme4 (41) in RStudio to compare the effect of the traps, sites and collection times  
194 on the abundance of mosquitoes. Function “glht” from package multcomp (42) was used for  
195 multiple comparisons between the levels of each fixed effect. *Trap*, *Time* and *Site* were  
196 included as fixed effects. *Sampling point* was included as a random factor. *Temperature* and  
197 *Humidity* were included as covariates; with *Rainfall* included as a binary factor. ANOVA was  
198 used to compare model fit by step-wise deletion of non-significant variables, using the  
199 Akaike Information Criterion (AIC) as an indicator of a better model fit. Simpson’s diversity  
200 index per *Trap*, *Site* and *Time* was calculated to compare the species diversity.

## 201 **RESULTS**

### 202 **Comparison of five adult mosquito traps**

203 A total of 10,610 mosquitoes were trapped by the five adult mosquito traps across the 30  
204 collection intervals (15 days and 15 nights) of the study. In terms of abundance, the ST  
205 captured the highest percentage of the total number of mosquitoes collected (67%), followed  
206 by the LT (24%), the BG2-MB5 lure (4%), the GT (3%) and the BG2-BG lure (2%) (Table 1).  
207 The diversity of species was measured using the Simpson’s diversity index. Results showed



208 that the BG2-BG captured the most diverse range of mosquito species (Simpson's diversity  
209 index = 0.157), followed by the GT (0.241), BG2-MB5 (0.24), LT (0.415) and ST (0.484)  
210 (Table 1).

211 The majority of the mosquitoes collected across this study belonged to the main genera:  
212 *Anopheles*, *Aedes* and *Culex*. However, the ST and LT captured one and two *Uranotaenia*  
213 mosquitoes respectively, the BG2-MB5 captured two *Mansonia* and the BG2-BG captured  
214 one *Eretmapodites*. Further information on species captured by each trap is shown in Table  
215 2A. Regarding the sex of collected mosquitoes, 38% of specimens captured by the LT and  
216 ST were males, whereas for the other traps, males were less than 22%. GT caught the  
217 highest proportion of gravid females, whereas unfed females represented the highest  
218 proportion of the catch in other traps. Bloodfed females made up the smallest group, with the  
219 BG2-MB5 lure trapping the highest relative proportion. The total numbers of bloodfed  
220 females were too low for comparative bloodmeal analysis (Table 1). 'Damage state' of the  
221 specimens was also annotated and assessed. No specimens were damaged by the gravid  
222 trap, less than 10% of the specimens were damaged in both BG2 and 10% of specimens  
223 were damaged in the LT (data not shown). However, the ST resulted in the highest  
224 proportion of damaged mosquitoes at approximately 20%, of which nearly one quarter could  
225 not be morphologically identified (Table 1). Although the ST captured the largest number of  
226 mosquitoes, this trap also collected a large number of non-target Diptera and ants, making  
227 sorting of the specimens time-consuming (Figure 3).

## 228 **Generalised Linear Mixed Model for mosquito abundance**

229 A negative binomial GLMM was used to determine statistical differences between the  
230 abundance of mosquitoes captured by each trap. The results indicated that the following  
231 parameters influenced the number of mosquitoes collected: Site (Maferinyah Centre One,  
232 Senguelen and Fandie), Time Period (evening and morning), Trap (BG2-BG, BG2-MB5, GT,  
233 LT, ST) and Sampling Point (random factor). Rainfall, temperature and humidity did not

234 significantly influence the data, however, humidity was included as a random factor. The  
235 final, best-fit model was:  $Abundance \sim Site + (1|Point) + (1|Humidity) + Time + Trap$ .  
236 According to this model, there were no significant differences between the abundance of  
237 mosquitoes captured by the GT, the BG2-MB5 and the BG2-BG (Table S3). There were no  
238 differences either between the abundance of mosquitoes captured by the GT and the LT.  
239 However, there were significant differences between the abundance of mosquitoes captured  
240 by LT and BG2-MB5 ( $p=0.057$ ) and LT and BG2-BG ( $P<0.005$ ). Finally, significant  
241 differences were found between the abundance of mosquitoes captured by the ST and all  
242 the rest of the traps: ST and BG2-MB5 ( $P<0.001$ ), ST and BG2-BG ( $P<0.001$ ), ST and GT  
243 ( $P<0.001$ ) and ST and LT ( $P<0.05$ ) (Table S3). Regarding sites and collection intervals,  
244 more mosquitoes were captured in Senguelen than in Maferinyah Centre One and Fandie  
245 ( $P<0.001$ ) and significantly more mosquitoes were captured during the night than during the  
246 day ( $P<0.001$ ).

247 The above model was used to assess the effectiveness of the different traps at capturing  
248 *Aedes*, *Anopheles* and *Culex* mosquitoes in general, and *An. gambiae* s.l. and *Ae. aegypti*  
249 species in particular, since they are the main vectors of disease. The results showed that  
250 while no differences are shown between the abundance of *Aedes* mosquitoes captured by  
251 the traps, both BG2 are significantly better at capturing *Ae. aegypti* mosquitoes (Table 3).  
252 The ST resulted to be the best at capturing the *Anopheles* genus and *An. gambiae* s.l. in  
253 particular, although it presented significant differences only when compared with the GT.  
254 Finally, the ST was significantly better at capturing *Culex* mosquitoes than any other trap,  
255 followed by the LT (Table 3).

### 256 **Comparison of *An. gambiae* complex species collected using HLCs and adult** 257 **mosquito traps**

258 A total of 2,232 *An. gambiae* s.l. females were collected using HLCs across the 15 collection  
259 intervals (15 nights) of the study. 1,940 were collected from Senguelen, 273 from Yindi and

260 29 from Maferinyah Centre One. Subsamples of 86 and 236 specimens of the *An. gambiae*  
261 s.l. mosquitoes collected from Senguelen using HLCs and adult mosquito traps respectively,  
262 were selected for molecular identification and comparison of species composition (Figure 4).  
263 Results showed that *An. melas* was the predominant species (85%) caught by adult  
264 mosquito traps, whereas it was collected the least (10%) using HLCs. *Anopheles coluzzii*  
265 and *An. gambiae* s.s. / *An. coluzzii* hybrids were the most abundant species collected using  
266 HLCs (40% and 35% respectively), whereas these were 12% and 2% of the collections  
267 respectively using adult traps. *Anopheles gambiae* s.s. represented 15% of the individuals  
268 collected using HLCs whereas this species was only 1% of the individuals collected using  
269 adult traps.

#### 270 **Species composition in the Maferinyah subprefecture**

271 Senguelen was the site with the highest number of mosquitoes (5,784) followed by Fandie  
272 (4,094) and Maferinyah Centre One (732) (Table 4). The diversity of the species from the  
273 day collection (07:00 to 19:00) was similar to the night collection (19:00 to 07:00) in  
274 Senguelen and Maferinyah Centre One, presenting a Simpson's diversity index of around  
275 0.2 and 0.3 respectively. However, Fandie showed a high diversity in the day collection  
276 (0.142) and a low diversity in the night collection (0.48) (Table 4). Further information on  
277 species captured in each site and during each collection period are shown in Tables 2B and  
278 2C. A total of 25 species were found across the three sites (using a combination of  
279 morphological and/or molecular identification), belonging to the *Aedes*, *Anopheles*, *Culex*,  
280 *Eretmapodites*, *Mansonia* and *Uranotaenia* genera. One *Toxorhynchites* (*Tx.*) *brevipalpis*  
281 was also captured during a morning collection in Fandie by the BG2-BG lure combination.  
282 However, the power failed to one of the traps during this round, and therefore the collection  
283 could not be included in the analysis.

284 A subsample of 370 specimens were selected for molecular identification. This subsample  
285 included 249 *Anopheles*, 24 *Aedes*, 96 *Culex* and 1 *Eretmapodites* individual. These

286 numbers represented 47.2%, 2.7%, 1.1% and 100% respectively of the total number of  
287 collected mosquitoes within each genera (Table S4A). The 370 specimens selected for  
288 molecular identification were chosen in order to confirm the species identity of mosquitoes  
289 collected using all traps across the three sites, representing 1.4%, 8.5% and 4.4% of the  
290 total collections from Fandie, Maferinyah Centre One and Senguelen respectively (Table  
291 S4B). In total, 20 species were confirmed by Sanger sequencing (Table S5). *An. coustani*  
292 was confirmed by sequencing a fragment of the *ITS2* gene. A combination of *ITS2* gene  
293 fragment sequencing (32) and species-specific end-point PCRs (29,30) allowed the  
294 identification of the following *An. gambiae* complex species: *An. gambiae* s.s., *An. coluzzii*  
295 and *An. melas*. *An. squamosus* was confirmed by sequencing a fragment of the *COI* gene  
296 (31). Sequencing of a different fragment of the *COI* gene (33) confirmed the presence of *Lt.*  
297 *tigripes*, *Cx. watti* and individuals from the *Cx. pipiens* complex. A combination of the *COI*  
298 gene fragment sequencing and the ACE multiplex PCR (34) confirmed the presence of *Cx.*  
299 *pipiens*, *Cx. quinquefasciatus* and hybrids in Guinea. Sequences with 94.88% identity to the  
300 species *Cx. watti* were also generated, but this would more likely be indicative of a closely  
301 related species with no sequences available in GenBank currently. Top BLAST results from  
302 some *Culex* individuals resulted in most significant alignments with *Cx. sitiens* sequences,  
303 generating maximum identities ranging from 97.19% to 97.64% with this fragment of the *COI*  
304 gene (33). Further confirmation attempts of these individuals, utilising one of the alternative  
305 *COI* fragments (35) as geographically closer *Cx. sitiens* GenBank sequences (from Kenya)  
306 were available for comparison for this fragment, resulted in maximum identities of 97.57%.  
307 Although these identities are just below the 98% threshold, it is likely this species is *Cx.*  
308 *sitiens*, but that the sequences from Guinea exhibit genetic variation to those for this species  
309 currently available in GenBank, or, that this is a very closely related species. To avoid the  
310 possibility of inaccurate confirmation, individuals from this species are referred to as *Cx. cf.*  
311 *sitiens*. Sequencing of the alternative *COI* fragment (35) confirmed the following *Aedes*  
312 species: *Ae. aegypti*, *Ae. vittatus*, *Ae. fowleri*, *Ae. cumminsi*, *Ae. argenteopunctatus* and a  
313 species within the *Ae. simpsoni* complex. Top BLAST results for *Aedes* individuals that

314 resulted in *Ae. luteocephalus* and *Ae. denderensis* presented a maximum identity of 91.19  
315 and 92.14% respectively, suggesting these individuals were closely related species which  
316 have no sequences currently available in GenBank. The analysis of the same *COI* sequence  
317 (35) also confirmed the presence of *Er. intermedius*.

## 318 **DISCUSSION**

319 This study provides the first entomological survey in Guinea that compares the mosquito  
320 species abundance and diversity using a range of different adult mosquito traps. Other  
321 studies in West Africa have utilised some of these traps individually, such as CDC light traps  
322 (LT) in Guinea (22) and Sierra Leone (43), and gravid traps (GT) in Ghana (9). This is also  
323 the first study that compares the performance of a Stealth trap (ST) with other mosquito  
324 traps to catch mosquitoes in a field setting. The results presented in our study show  
325 significant differences in the abundance of mosquitoes captured by the ST and the rest of  
326 the traps. The ST captured the greatest number of mosquitoes, followed by the LT, BG2 with  
327 MB5 lure (BG2-MB5), GT and BG2 with BG lure (BG2-BG). Therefore, the use of LT, and  
328 particularly ST, would be recommended for studies that are aiming to obtain large numbers  
329 of particular mosquito species. The fact that ST captured significantly more mosquitoes than  
330 LT ( $P < 0.05$ ) is surprising considering that their performance is similar: when the light attracts  
331 the mosquitoes, they get trapped after passing through a fan. The addition of a UV light, a  
332 smaller size and black and camouflage fabric are the only features that make the ST  
333 different to the LT. The ST can be used in four different ways by combining two types of light  
334 and the presence or absence of CO<sub>2</sub>. For this study, both lights and CO<sub>2</sub> were used, so  
335 further studies should compare the efficacy of the ST when performing with the other  
336 combinations. The ST, followed by the LT, captured the highest proportion of male  
337 mosquitoes in comparison with the rest of the traps (Table 1), so they could be utilised in  
338 studies looking at male behaviour. In general across the traps, sites and collection intervals,  
339 all the study collections presented a greater number of females than males. However,  
340 interestingly this composition was reverted in two collections, and a greater number of males

341 was captured – in sampling points C and E in Fandie. The fact that these two sampling  
342 points may have been located next to a swarm could be a potential explanation (44).

343 Previous studies suggest that the LT are optimal for catching *Anopheles* (45), however, the  
344 main genus captured by the LT was *Culex*. In contrast, the ST was the best at capturing the  
345 largest number of *Anopheles* mosquitoes in general and *An. gambiae* s.l. in particular.  
346 According to Costa-Neta *et al.* (46), the higher the intensity of the light source, the higher the  
347 number of *Anopheles* captured. This may be one reason why the ST captured the highest  
348 number of *Anopheles* (Table 1 and 3).

349 Previous studies suggest that the GT are good at catching *Culex* (47), and this was indeed  
350 the main genus captured by this trap. However, the ST was significantly better at capturing  
351 large numbers of *Culex* mosquitoes (Table 1 and 3). As expected, this trap also captured the  
352 highest proportion of gravid females. Additionally, all of the specimens were un-damaged,  
353 since the design of the trap allows the collection of specimens without passing through a fan,  
354 so its use could be beneficial to capture mosquitoes with the objective of establishing a  
355 colony or screening for arbovirus transmission.

356 Due to the small sample size, no conclusions can be made regarding the best collection  
357 method for *Eretmapodites*, *Mansonia* and *Uranotaenia* mosquitoes. Although the ST showed  
358 the best performance in terms of abundance of mosquitoes captured, this trap also caused  
359 significant damage to specimens, making morphological identification time-consuming and  
360 inaccurate. One reason for this damage could be the high density of collected specimens  
361 (Figure 3A), which remained in the trap for up to 12 hours during trapping intervals,  
362 depending on trap entry time. In addition to this, the presence of ants and big Diptera could  
363 have also contributed to this damage (Figure 3A and 3B). Another reason could be the low  
364 protection that this trap confers to the collected specimens from rainfall, due to the small  
365 surface area of the cover / rain shield, resulting in wet and clumping specimens (Figure 3C).  
366 Therefore, the performance of the ST could potentially be improved by using it for shorter  
367 periods of time or by swapping collection bags more often, to reduce the high densities of

368 mosquitoes within the same collection bag. Also, by choosing locations offering greater  
369 protection from rainfall, which could help reduce damage to the specimens.

370 The BG lure is designed to attract mainly *Aedes* whereas the MB5 lure was specifically  
371 designed for *Anopheles* (48,49). Although BG2 with BG lure have been used in Burkina  
372 Faso (50), to our knowledge no traps have been used in West Africa with the MB5 lure so  
373 far, so both lures were tested in the two BG2 in this study. Previous studies suggest that the  
374 BG2 in general are effective for catching *Aedes* mosquitoes (51), and that the addition of the  
375 BG lure improves this (51). In this study no significant differences were seen in the number  
376 of *Aedes* mosquitoes (at genus level) captured by the five different traps, although the high  
377 proportion of *Aedes* specimens captured by the BG2-BG (Table 1), in comparison with the  
378 rest of the traps, suggests the composition of the BG lure is good at attracting this genus in  
379 particular. This finding also supports previous studies which have also shown the good  
380 performance of this trap-lure combination at capturing *Ae. aegypti* mosquitoes in Brazil (52).  
381 Additionally, both BG2 presented the best performance at capturing *Ae. aegypti* mosquitoes  
382 in comparison with the rest of the traps, with no differences between the two lures (Table 3),  
383 suggesting two possibilities: first, it is the design of the trap and not the lure that works so  
384 well at capturing *Ae. aegypti* mosquitoes. Second, the addition of the lure improves the  
385 attraction of *Ae. aegypti* mosquitoes but no difference is present between the BG and the  
386 MB5 lures at attracting this species. Both BG2 demonstrated effective performance at  
387 capturing *Anopheles* mosquitoes (as reported by Pombi *et al.* (50)). The MB5 lure was  
388 designed for attracting *Anopheles* mosquitoes (49), and indeed it was demonstrated to be  
389 better than the BG2-BG at capturing *Anopheles* mosquitoes and in particular *An. gambiae*  
390 s.l. However, no significant differences were seen between both (Table 3), indicating that the  
391 MB5 lure needs further improvement in order to obtain more effective collections of this  
392 genus. Since the ST showed the best performance for *Anopheles* (and *An. gambiae* s.l.)  
393 and no significant differences were shown between the ST and the two BG2, its use could  
394 be recommended for studies specifically looking at these genera, although an increased



395 number of trapping intervals would be required to increase the number of mosquitoes  
396 captured.

397 Diversity takes into account richness (number of different species) and evenness  
398 (comparison of population size of each species). Although the number of species captured  
399 by the LT and ST was higher than the other traps (higher richness), the difference in the  
400 number of specimens from each species was higher than the other traps (low evenness).  
401 Therefore, the diversity of the mosquito populations captured by LT and ST was the least  
402 diverse. The BG2-BG presented the most diverse collection of mosquitoes, followed by the  
403 GT and the BG2-MB5. Therefore, these three traps would be recommended for studies  
404 looking at species diversity, as opposed to LT and ST, which would be recommended for  
405 studies requiring a large number of mosquitoes of a particular species, with exception of  
406 some species (see Table 2A).

407 Human landing catches are the gold standard method for measuring exposure of humans to  
408 mosquito bites (53). However, this method is labour-intensive and faces ethical  
409 considerations (54), as operators are potentially exposed to pathogens during collections.  
410 Since adult mosquito traps are an affordable and easy to use alternative which provides  
411 reliable entomological data about malaria transmission (55), we compared both methods  
412 specifically targeting the major malaria vectors in the *An. gambiae* complex. Human landing  
413 catches captured predominantly *An. coluzzii*, *An. gambiae* s.s. and hybrids, but they only  
414 captured a small percentage of *An. melas*. Alternatively, more than three quarters of the trap  
415 collections were *An. melas* and only a small percentage was *An. coluzzii*, followed by a  
416 smaller proportion of *An. gambiae* s.s. and hybrids. *Anopheles gambiae* s.s. and *An. coluzzii*  
417 are highly anthropophilic, whereas *An. melas* is considered opportunistic, feeding on  
418 humans when available and on other mammals otherwise (56). Although different cues such  
419 as lights and lures that mimic human odours are used in mosquito traps to try to attract host-  
420 seeking females, HLCs are more effective at attracting anthropophilic *Anopheles* species.  
421 Therefore, this method would still be recommended for targeting species with this behaviour.



422 These results also suggest that an improvement in lures or trap design is needed to better  
423 mimic human cues and increase the number of anthropophilic species captured. Some  
424 studies have tried this in the past by modifying BG sentinel traps to increase the captures of  
425 *An. darlingi* (57) and *An. arabiensis* (58) mosquitoes and use them as an alternative for  
426 HLCs. However, others have also shown that HLCs are still more effective at capturing  
427 *Anopheles* species in comparison with adult traps, whose main collections comprise  
428 Culicines (59), as seen in the present study. Since in our study both methods – HLCs and  
429 mosquito traps – were undertaken outdoors, no conclusions can be made about which  
430 method would work more effectively for targeting different feeding and resting behaviours.

431 Senguelen, a rural site, presented the highest relative abundance of mosquitoes, whereas  
432 Maferinyah Centre One, a semi-urban site, presented the lowest relative abundance. In  
433 terms of mosquito species diversity, the former was also more diverse than the latter. The  
434 fact that the rural site was surrounded by dense vegetation and breeding sites, as opposed  
435 to the semi-urban environment, could explain these differences. Both Senguelen and  
436 Maferinyah Centre One presented similar diversities between day and night collections.  
437 However, Fandie presented the highest diversity during the day and the lowest diversity  
438 during the night, likely due to the most diverse range of day-biting species present in this  
439 semi-rural area. As expected, the abundance of mosquitoes captured during the night was  
440 significantly higher than the day collection, since some of the most abundant mosquitoes of  
441 the collection, such as *Cx. quinquefasciatus*, are night biters. The highly abundant *Cx. cf.*  
442 *sitiens* were also mostly collected at night, indicating similar behaviour to *Cx. sitiens* which  
443 are known night biters (60). Some day biting mosquitoes, like *Ae. aegypti*, may have been  
444 found in the night collection, as well as some night biters, like *An. gambiae* s.l., may have  
445 been found in the day collection, likely due to the inclusion of dawn and dusk in the night and  
446 day collections respectively.

447 Traditionally, identification of mosquitoes has been carried out using morphology. However,  
448 morphological identification can be time-consuming and inaccurate sometimes, especially

449 when the specimens do not present obvious and exclusive features or when they are  
450 damaged, as seen in the mosquitoes collected by the ST in this study. Molecular tools such  
451 as PCR and sequencing can improve entomological studies by overcoming these limitations.  
452 As an example, one of the female mosquitoes collected using HLCs presented long palps –  
453 typical from the *Anopheles* genus – but it was white in colour and did not present the  
454 common wing and leg patterns of many species of the *Anopheles* genus (Figure 5). This  
455 individual female could not be identified by experienced entomologists using *Anopheles* keys  
456 so DNA was extracted from this individual and PCR with Sanger sequencing revealed this  
457 species to be *An. coluzzii*. Random mutagenesis could be a potential explanation for this  
458 phenotype. Since molecular tools can complement and improve morphological identification  
459 of mosquitoes, it would be recommended to combine both for further entomological  
460 investigations.

461 Among the species whose presence was confirmed in Guinea using molecular methods, we  
462 identified important vectors of disease such as *An. gambiae* s.s. and *Ae. aegypti*. This  
463 suggests the potential for transmission of malaria, lymphatic filariasis and also several  
464 arboviruses of medical importance in this area of Guinea. Although they were found in  
465 Guinea, no evidence of pathogens transmitted by *Cx. watti* and *Lt. tigripes* was found from  
466 literature searches. The specimen from the *Eretmapodites* genus collected during this study  
467 was confirmed to be *Er. intermedius*. However, only *Er. silvestris*, *Er. inomatus* and *Er.*  
468 *quinquevittatus* have been found to be positive for Spondweni (SPOV), ZIKV and RVFV  
469 respectively (61). *Mansonia uniformis* and *Uranotaenia mashaensis* (both previously  
470 reported in Guinea) have been confirmed to be vectors of disease, but since no confirmation  
471 of species was undertaken for the collected *Mansonia* and *Uranotaenia* mosquitoes, further  
472 studies are needed. There have been historical arboviral outbreaks in Guinea so additional  
473 work should be undertaken to characterize vector longevity, anthropophily / zoophily and  
474 susceptibility to infection to determine the vectorial capacity for disease transmission in this  
475 country (62). *Toxorhynchites brevialpilis* and *Lt. tigripes* mosquitoes are not vectors of

476 human pathogens but their larvae, together with *Er. intermedius* larvae, play an important  
477 role as predators of other mosquito larvae (63); further investigation looking at larval density  
478 should be undertaken in Guinea. Of all the species recorded in this study in Maferinyah sub-  
479 prefecture, those identified as *Cx. cf. sitiens* were the most abundant. *Culex sitiens* have the  
480 ability to survive in brackish water and if these individuals present in Guinea share this  
481 characteristic they may therefore have more options for breeding sites. *Culex sitiens* can  
482 travel long distances (60) and the *Cx. cf. sitiens* collected in this study were found in all three  
483 sites, some 30 km away from the coast where *Cx. sitiens* might be expected to breed (60).  
484 *Anopheles squamosus* and *An. coustani* s.l. are secondary vectors of malaria and have  
485 been shown to be highly anthropophilic (64). *Anopheles melas* has not historically been  
486 classified as an important malaria vector, particularly when coexisting with *An. gambiae* s.s.  
487 or *An. arabiensis* (major malaria vectors). However, *An. melas* can tolerate brackish water  
488 and has been demonstrated to be anthropophilic if there is abundant availability of human  
489 hosts (65), so it could play an important role in transmission of malaria in the coastal regions  
490 of Guinea. To our knowledge, *Ae. simpsoni* s.l., *Cx. p. pipiens* and *Er. intermedius* have not  
491 been reported in Guinea (14,15,18,19,21). The identification of these species, in addition to  
492 the potential presence of *Cx. sitiens* (or a very closely related species), further supports the  
493 need to undertake regular entomological surveys to determine mosquito species diversity. In  
494 the current study more than 10,000 mosquitoes were collected in 15 days (30 collection  
495 intervals) and 20 species were confirmed from a representative subsample, despite the  
496 limitation of definitive species confirmation not being possible for certain specimens due to  
497 the absence of sufficiently close comparative sequences available in GenBank. Therefore, it  
498 is likely that additional species remain to be reported in Guinea and their potential role in  
499 transmission of mosquito-borne diseases needs to be evaluated.

## 500 **CONCLUSIONS**

501 Mosquito surveillance studies often incorporate both adult mosquito traps and HLCs. This  
502 study provides evidence for the comparative performance of five different mosquito trap-lure

503 combinations, in comparison with HLCs in Guinea. The five adult traps mainly collected  
504 members of the *An. gambiae* complex with opportunistic feeding behaviours, whereas HLCs  
505 were shown to preferentially collect anthropophilic species, demonstrating HLCs may still  
506 provide the optimal way to collect primary malaria vectors. However, the ST collected the  
507 largest number of mosquitoes and also the largest number of different species (19) across  
508 the three study sites, indicating it has beneficial properties for mosquito surveillance, in  
509 Guinea and similar sites in West Africa, to provide important entomological data on diverse  
510 mosquito populations. Due to the damage that this trap causes to the specimens, its  
511 performance could be optimised when used in shorter collection intervals and / or when  
512 sufficiently protected from adverse weather. This study has shown the importance of  
513 combining molecular tools with the morphological identification of specimens to improve  
514 entomological studies, revealing the presence of 25 mosquito species in this region of Guinea.

## 515 **ABBREVIATIONS**

516 BG2: BG sentinel 2 trap

517 BG2-BG: BG sentinel 2 trap with BG lure

518 BG2-MB5: BG sentinel 2 trap with MB5 lure

519 GLMM: generalized linear mixed model

520 GT: Gravid trap

521 HLC: Human Landing Catch

522 LT: CDC light trap

523 ST: Stealth trap

## 524 **ACKNOWLEDGEMENTS**

525 The authors would like to acknowledge Cheryl Whitehorn for her assistance with the  
526 morphological identification of some specimens. The authors would like to thank Ralph

527 Harbach of the Natural History Museum (London, UK) for looking at one of our mosquito  
528 samples for morphological identification. The authors are grateful to the three communities  
529 of Senguelen, Fandie and Maferinyah Centre One, and in particular the families which kindly  
530 offered their yards for this study. The authors would also like to acknowledge Mohamed  
531 Yattara and the 18 workers who contributed to the maintenance of the traps in the field, as  
532 well as the Centre de Formation et de Recherche en Sante Rurale de Maferinyah for hosting  
533 the field work aspects of this study.

#### 534 **FUNDING**

535 Funding was provided by a Bayer Research and Travel Grant for Vector Control and a  
536 London School of Hygiene and Tropical Medicine MSc Trust Fund Grant, both awarded to  
537 CCU. CLJ and TW were supported by a Wellcome Trust/Royal Society Sir Henry Dale  
538 Fellowship awarded to TW (101285/Z/13/Z). LAM was supported by an American Society for  
539 Microbiology/Centers for Disease Control and Prevention Fellowship and a Sir Halley  
540 Stewart Trust grant. PH was awarded a Bayer Research and Travel Grant for Vector Control  
541 and a London School of Hygiene and Tropical Medicine MSc Trust Fund Grant, as well as a  
542 Helena Vrobova Scholarship and a Royal Society of Tropical Medicine and Hygiene Small  
543 Grant. SRI was supported by the President's Malaria Initiative (PMI)/CDC. The funders had  
544 no role in study design, data collection and analysis, decision to publish, or preparation of  
545 the manuscript.

#### 546 **AVAILABILITY OF DATA AND MATERIALS**

547 The dataset supporting the conclusions of this article is included within the article and its  
548 additional files.

#### 549 **AUTHORS' CONTRIBUTIONS**

550 CCU designed the study, conducted and analysed the field and laboratory work and wrote  
551 the first draft of the manuscript. CLJ designed the study, analysed the sequencing data and  
552 co-wrote the manuscript. MK undertook fieldwork and laboratory analysis and contributed

553 to the practical design and logistics of the study. VAB designed the study and provided R  
554 codes for Latin Square analysis. PH undertook fieldwork and laboratory analysis. MS and  
555 HB helped to obtain local authorisation. MS and GC contributed to setting and collecting  
556 traps and mosquito identification. LAM contributed to field data analysis and supervision. TW  
557 designed the study, analysed the laboratory data, wrote the manuscript and provided overall  
558 supervision. TW and LAM obtained funding for the study. All authors read and approved the  
559 final version of the manuscript.

## 560 **ETHICS APPROVAL AND CONSENT TO PARTICIPATE**

561 The study protocol was reviewed and approved by the Comite National d’Ethique pour la  
562 Recherche en Sante (030/CNERS/17) and the institutional review boards (IRB) of the  
563 London School of Hygiene and Tropical Medicine (#14798 and #15127) and the Centers for  
564 Disease Control and Prevention, USA (2018-086); all study procedures were performed in  
565 accordance with relevant guidelines and regulations. Fieldworkers participating in human  
566 landing catches were provided with malaria prophylaxis for the duration of the study.

## 567 **CONSENT FOR PUBLICATION**

568 Not applicable

## 569 **COMPETING INTERESTS**

570 The authors declare that they have no competing interests

## 571 **REFERENCES**

- 572 1. Hanley KA, Monath TP, Weaver SC, Rossi SL, Richman RL, Vasilakis N. Fever  
573 versus fever: The role of host and vector susceptibility and interspecific competition in  
574 shaping the current and future distributions of the sylvatic cycles of dengue virus and  
575 yellow fever virus. *Infect Genet Evol.* 2013;19:292–311.
- 576 2. Russell TL, Govella NJ, Azizi S, Drakeley CJ, Kachur SP, Killeen GF. Increased  
577 proportions of outdoor feeding among residual malaria vector populations following  
578 increased use of insecticide-treated nets in rural Tanzania. *Malar J.* 2011;10:1–10.
- 579 3. Patz JA, Graczyk TK, Geller N, Vittor AY. Effects of environmental change on  
580 emerging parasitic diseases. *Int J Parasitol.* 2000;30(12–13):1395–405.
- 581 4. Killeen GF. Characterizing, controlling and eliminating residual malaria transmission.  
582 *Malar J.* 2014;13(1):1–22.
- 583 5. Service MW. Mosquito ecology: field sampling methods. Elsevier Applied Science;

- 584 1992.
- 585 6. Wong J, Bayoh N, Olang G, Killeen GF, Hamel MJ, Vulule JM, et al. Standardizing  
586 operational vector sampling techniques for measuring malaria transmission intensity :  
587 evaluation of six mosquito collection methods in western Kenya. *Malar J.* 2013;1–11.
- 588 7. Pombi M, Jacobs F, Verhulst NO, Caputo B, Torre A, Takken W. Field evaluation of a  
589 novel synthetic odour blend and of the synergistic role of carbon dioxide for sampling  
590 host-seeking *Aedes albopictus* adults in Rome, Italy. *Parasites and Vectors.* 2014;1–  
591 5.
- 592 8. Diallo D, Ndiaye EH, Fall G, Ba Y, Faye O, Dia I, et al. Evaluation of the Performance  
593 of Different Traps for Sampling Usutu and West Nile Viruses and Mosquito (Diptera:  
594 Culicidae) Vectors in Senegal. *J Med Entomol.* 2019;56:149–55.
- 595 9. Opoku M, Minetti C, Kartey-Attipoe WD, Otoo S, Otchere J, Gomes B, et al. An  
596 assessment of mosquito collection techniques for xenomonitoring of anopheline-  
597 transmitted Lymphatic Filariasis in Ghana. *Parasitology.* 2018;1–9.
- 598 10. Institut National de la Statistique, Ministère du Plan, Ministère d'Etat de la Santé et  
599 the l'Hygiène publique. Enquête démographique et de santé et à indicateurs  
600 multiples. *ICF Int.* 2012;39.
- 601 11. WHO. World Malaria Report. 2017. 196 p.
- 602 12. The World Bank. Guinea [Internet]. 2018. Available from:  
603 <https://www.worldbank.org/en/country/guinea/overview>
- 604 13. Nathan N, Barry M, Van Herp M, Zeller H. Shortage of vaccines during a yellow fever  
605 outbreak in Guinea. *Lancet.* 2001;358(9299):2129–30.
- 606 14. Adam J., Bailly-Choumara J. Les Culicidae de la République de Guinée et quelques  
607 autres dipteres hematophages. *Bull l'IFAN.* 1964;Série A(3).
- 608 15. Baldé MC, Dieng B, Diallo A, Camara SK, Konstantinov OK, Mourzine NC.  
609 Contribution à l'étude des moustiques (Diptera: Culicidae) de la Guinée. *Faune et*  
610 *distribution. Entomol médicale.* 2000;
- 611 16. Coulibaly B, Kone R, Barry MS, Emerson B, Coulibaly MB, Niare O, et al. Malaria  
612 vector populations across ecological zones in Guinea Conakry and Mali, West Africa.  
613 *Malar J.* 2016;15(1):1–10.
- 614 17. Gillies M, Meillon D. The Anophelinae of Africa south of the Sahara (Ethiopian  
615 zoogeographical region). *Sahara Ethiop Zoogeographical.* 1968;343.
- 616 18. Huang Y-M. The subgenus *Stegomyia* of *Aedes* in the Afrotropical Region with keys  
617 to the species (Diptera: Culicidae). *Zootaxa 700 Magnolia Press.* 2004;
- 618 19. Kouassi BL, De Souza DK, Goepogui A, Narh CA, King SA, Mamadou BS, et al.  
619 Assessing the presence of *Wuchereria bancrofti* in vector and human populations  
620 from urban communities in Conakry, Guinea. *Parasites and Vectors.* 2015;8(1):1–9.
- 621 20. Vezenegho SB, Koekemoer LL, Brooke BD, Hunt RH, Coetzee M. Malaria vector  
622 composition and insecticide susceptibility status in Guinea Conakry, West Africa. *Med*  
623 *Vet Entomol.* 2009;23:326–34.
- 624 21. White G. Family Culicidae. In: Crosskey R, editor. *Catalogue of the Diptera of the*  
625 *Afrotropical Region.* British Mu. London; 1980. p. 114–48.
- 626 22. Keita K, Camara D, Barry Y, Osse R, Wang L, Sylla M, et al. Species Identification  
627 and Resistance Status of *Anopheles gambiae* s.l. (Diptera: Culicidae) Mosquitoes in



- 628 Guinea. J Med Entomol. 2017;54:677–81.
- 629 23. Camara A, Keita K, Dioubat M, Barry Y, Camara D, Loua Z, et al. Rapid  
630 Epidemiological and Entomological Survey for Validation of Reported Indicators and  
631 Characterization of Local Malaria Transmission in Guinea , 2017. Am J Trop Med  
632 Hyg. 2018;99(5):1134–44.
- 633 24. Kouassi BL, De Souza DK, Goepogui A, Balde SM, Diakité L, Sagnon A, et al. Low  
634 prevalence of Plasmodium and absence of malaria transmission in Conakry, Guinea:  
635 Prospects for elimination. Malar J. 2016;15(1):1–13.
- 636 25. Dhaniq C.T. J, Terry M, Azad M. Yeast-generated CO<sub>2</sub>: A convenient source of  
637 carbon dioxide for mosquito trapping using the BG-sentinel traps. Asian Pac J Trop  
638 Biomed. 2017;7(10):896–900.
- 639 26. WRBU: Mosquito Identification Resources [Internet]. Available from:  
640 [http://www.wrbu.org/VeclID\\_MQ.html](http://www.wrbu.org/VeclID_MQ.html)
- 641 27. Edwards FW. Mosquitoes of the Ethiopian Region. London; 1941.
- 642 28. Gillies MT, Coetzee M. A Supplement to the Anophelinae of Africa South of the  
643 Sahara. Vol. 55, South African Institute for medical research. 1987. 63 p.
- 644 29. Santolamazza F, Mancini E, Simard F, Qi Y, Tu Z, Della Torre A. Insertion  
645 polymorphisms of SINE200 retrotransposons within speciation islands of *Anopheles*  
646 *gambiae* molecular forms. Malar J. 2008;7:1–10.
- 647 30. Scott J, Brogdon W, Collins F. Identification of single specimens of the *Anopheles*  
648 *gambiae* complex by the polymerase chain reaction. Am J Trop Med Hyg.  
649 1993;49(4):520–9.
- 650 31. Oshaghi MA, Yaaghoobi F, Abaie MR. Pattern of mitochondrial DNA variation  
651 between and within *Anopheles stephensi* (Diptera: Culicidae) biological forms  
652 suggests extensive gene flow. Acta Trop. 2006;99:226–33.
- 653 32. Beebe NW, Saul A. Discrimination of all Members of the *Anopheles punctulatus*  
654 Complex by Polymerase Chain Reaction-Restriction Fragment Length Polymorphism  
655 Analysis. Am J Trop Med Hyg. 1995;53(5):478–81.
- 656 33. Kumar NP, Rajavel AR, Natarajan R, Jambulingam P. DNA Barcodes Can Distinguish  
657 Species of Indian Mosquitoes (Diptera: Culicidae). J Med Entomol. 2007;44(1):01–7.
- 658 34. Smith JL, Fonseca DM. Rapid assays for identification of members of the *Culex*  
659 (*Culex*) *pipiens* complex, their hybrids, and other sibling species (Diptera: culicidae).  
660 Am J Trop Med Hyg. 2004;70(4):339–45.
- 661 35. Folmer O, Black M, Hoeh W, Lutz R, Vrijenhoek R. DNA primers for amplification of  
662 mitochondrial cytochrome c oxidase subunit I from diverse metazoan invertebrates.  
663 Mol Mar Biol Biotechnol. 1994;3(5):294–9.
- 664 36. Kumar S, Stecher G, Tamura K. MEGA7: Molecular Evolutionary Genetics Analysis  
665 Version 7.0 for Bigger Datasets. Mol Biol Evol. 2016;33(7):1870–4.
- 666 37. Altschul SF, Gish W, Miller W, Myers EW, Lipman DJ. Basic local alignment search  
667 tool. J Mol Biol. 1990;215(3):403–10.
- 668 38. Benson DA, Karsch-Mizrachi I, Lipman DJ, Ostell J, Wheeler DL. GenBank. Nucleic  
669 Acids Res. 2005;33:34–8.
- 670 39. Wickham H, François R, Henry L, Müller K, RSudio. Package “dplyr.” 2018;



- 671 40. RStudio Team. RStudio: Integrated Development for R. RStudio. Boston, MA; 2016.
- 672 41. Bates D, Maechler M, Bolker B, Walker S. Fitting Linear Mixed-Effects Models Using  
673 lme4. J Stat Softw. 2015;67:1–48.
- 674 42. Bretz F, Westfall P, Heiberger RM, Schuetzenmeister A, Scheibe S. Package  
675 “multcomp.” 2017;
- 676 43. Magbity EB, Lines JD, Marbiah MT, David K, Peterson E. How reliable are light traps  
677 in estimating biting rates of adult *Anopheles gambiae* s.l. (Diptera: Culicidae) in the  
678 presence of treated bed nets? Bull Entomol Res. 2002;(2002):71–6.
- 679 44. Diabaté A, Yaro AS, Dao A, Diallo M, Huestis DL, Lehmann T. Spatial distribution and  
680 male mating success of *Anopheles gambiae* swarms. BMC Evol Biol. 2011;11(1).
- 681 45. Onyango SA, Kitron U, Mungai P, Muchiri EM, Kokwaro E, King CH, et al. Monitoring  
682 Malaria Vector Control Interventions: Effectiveness of Five Different Adult Mosquito  
683 Sampling Methods. J Med Entomol. 2013;50(5):1140–51.
- 684 46. Costa-Neta BM, Lima-Neto AR, da Silva AA, Brito JM, Aguiar JVC, Ponte IS, et al.  
685 Centers for Disease Control-type light traps equipped with high-intensity light-emitting  
686 diodes as light sources for monitoring *Anopheles* mosquitoes. Acta Trop.  
687 2018;183:61–3.
- 688 47. Irish SR, Moore SJ, Derua YA, Bruce J, Cameron MM. Evaluation of gravid traps for  
689 the collection of *Culex quinquefasciatus*, a vector of lymphatic filariasis in Tanzania.  
690 Trans R Soc Trop Med Hyg. 2013;107(1):15–22.
- 691 48. Verhulst NO, Mbadi PA, Kiss GB, Mukabana WR, Van Loon JJA, Takken W, et al.  
692 Improvement of a synthetic lure for *Anopheles gambiae* using compounds produced  
693 by human skin microbiota. Malar J. 2011;10:1–9.
- 694 49. Mukabana WR, Mweresa CK, Otieno B, Omusula P, Smallegange RC, van Loon JJA,  
695 et al. A Novel Synthetic Odorant Blend for Trapping of Malaria and Other African  
696 Mosquito Species. J Chem Ecol. 2012;38(3):235–44.
- 697 50. Pombi M, Guelbeogo WM, Calzetta M, Sagnon NF, Petrarca V. Evaluation of a  
698 protocol for remote identification of mosquito vector species reveals BG-Sentinel trap  
699 as an efficient tool for *Anopheles gambiae* outdoor collection in Burkina Faso. Malar J.  
700 2015;
- 701 51. Li Y, Su X, Zhou G, Zhang H, Puthiyakunnon S, Shuai S, et al. Comparative  
702 evaluation of the efficiency of the BG-Sentinel trap, CDC light trap and Mosquito-  
703 oviposition trap for the surveillance of vector mosquitoes. Parasites and Vectors.  
704 2016;9(1):1–8.
- 705 52. Kröckel AU, Rose A, Eiras ÁE, Geier M. New tools for surveillance of adult yellow  
706 fever mosquitoes: comparison of trap catches with human landing rates in an urban  
707 environment. J Am Mosq Control Assoc. 2006;22(2):229–38.
- 708 53. John B. Silver. Mosquito Ecology: Field Sampling Methods. 3rd ed. Springer; 2008.  
709 1477 p.
- 710 54. WHO. Ethical Issues Associated With Vector-Borne Diseases. 2017;
- 711 55. Briët OJT, Huho BJ, Gimnig JE, Bayoh N, Seyoum A, Sikaala CH, et al. Applications  
712 and limitations of Centers for Disease Control and Prevention miniature light traps for  
713 measuring biting densities of African malaria vector populations: a pooled-analysis of  
714 13 comparisons with human landing catches. Malar J. 2015;1–13.
- 715 56. Sinka ME, Bangs MJ, Manguin S, Coetzee M, Mbogo CM, Hemingway J, et al. The

- 716 dominant Anopheles vectors of human malaria in Africa, Europe and the Middle East:  
717 occurrence data, distribution maps and bionomic précis. *Parasites and Vectors*.  
718 2010;3:117.
- 719 57. Gama RA, Maria I, Geier M, Eiras ÁE. Development of the BG-Malaria trap as an  
720 alternative to human-landing catches for the capture of *Anopheles darlingi*.  
721 2013;108:763–71.
- 722 58. Batista EPA, Ngowo HS, Opiyo M, Shubis GK, Meza C, Okumu FO, et al. Semi-field  
723 assessment of the BG-Malaria trap for monitoring the African malaria vector,  
724 *Anopheles arabiensis*. *PLoS One*. 2017;5:1–17.
- 725 59. Batista EPA, Ngowo H, Opiyo M, Shubis GK, Meza C, Id DJS, et al. Field evaluation  
726 of the BG-Malaria trap for monitoring malaria vectors in rural Tanzanian villages.  
727 *PLoS One*. 2018;1–18.
- 728 60. *Culex (Culex) sitiens* Wiedemann. *New Zeal Biosecure*. 2006;
- 729 61. Braack L, Gouveia de Almeida AP, Cornel AJ, Swanepoel R, Jager C De. Mosquito-  
730 borne arboviruses of African origin: review of key viruses and vectors. *Parasites and*  
731 *Vectors*. 2018;11:29.
- 732 62. Cohuet A, Harris C, Robert V, Fontenille D. Evolutionary forces on *Anopheles*: what  
733 makes a malaria vector? *Trends Parasitol*. 2010;26(3):130–6.
- 734 63. Lane RP, Crosskey RW. *Medical insects and arachnids*. Department of Entomology,  
735 The Natural History Museum, London; 1993.
- 736 64. Fornadel CM, Norris LC, Franco V, Norris DE. Unexpected Anthropophily in the  
737 Potential Secondary Malaria Vectors *Anopheles coustani* s.l. and *Anopheles*  
738 *squamosus* in Macha, Zambia. *Vector-Borne Zoonotic Dis*. 2011;11(8):1173–9.
- 739 65. Muirhead-Thomson RC. Studies on *Anopheles gambiae* and *A. melas* in and around  
740 Lagos. *Bull Entomol Res*. 1948;38(4):527–58.
- 741
- 742
- 743
- 744
- 745
- 746
- 747
- 748
- 749

750 **FIGURES**

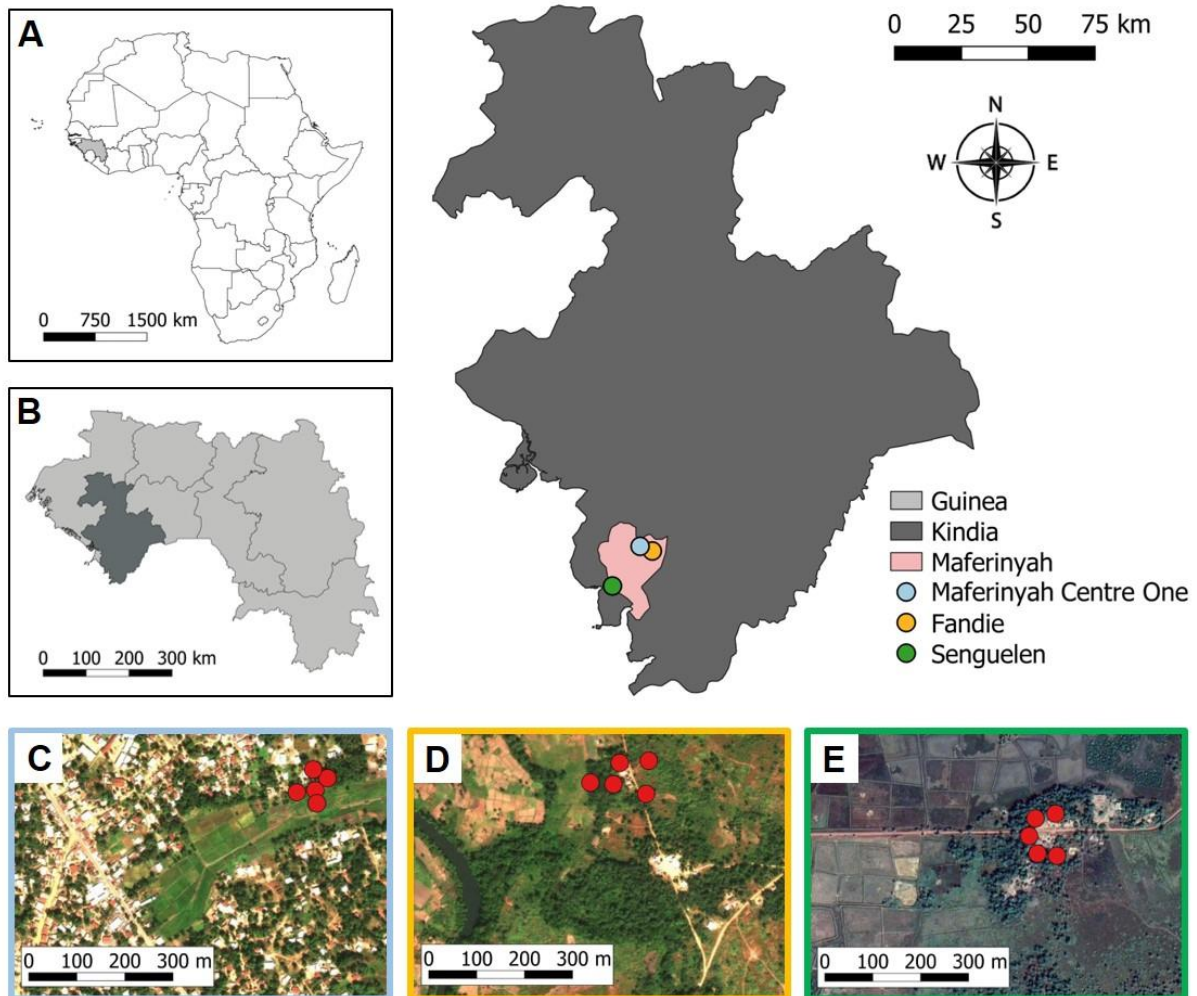

751

752 **Figure 1.** Location of the Maferinyah sub-prefecture and the three study sites in Kindia, Guinea. A.  
753 Guinea (light grey) in Africa. B. Region of Kindia (dark grey) in Guinea. C. Sampling points (red) in  
754 Maferinyah Centre One. D. Sampling points (red) in Fandie. E. Sampling points (red) in Senguelen.  
755 Maps were obtained using QGIS. Basemaps were obtained from ArcGIS online and Google Maps  
756 Satellite.

757

758

759

760



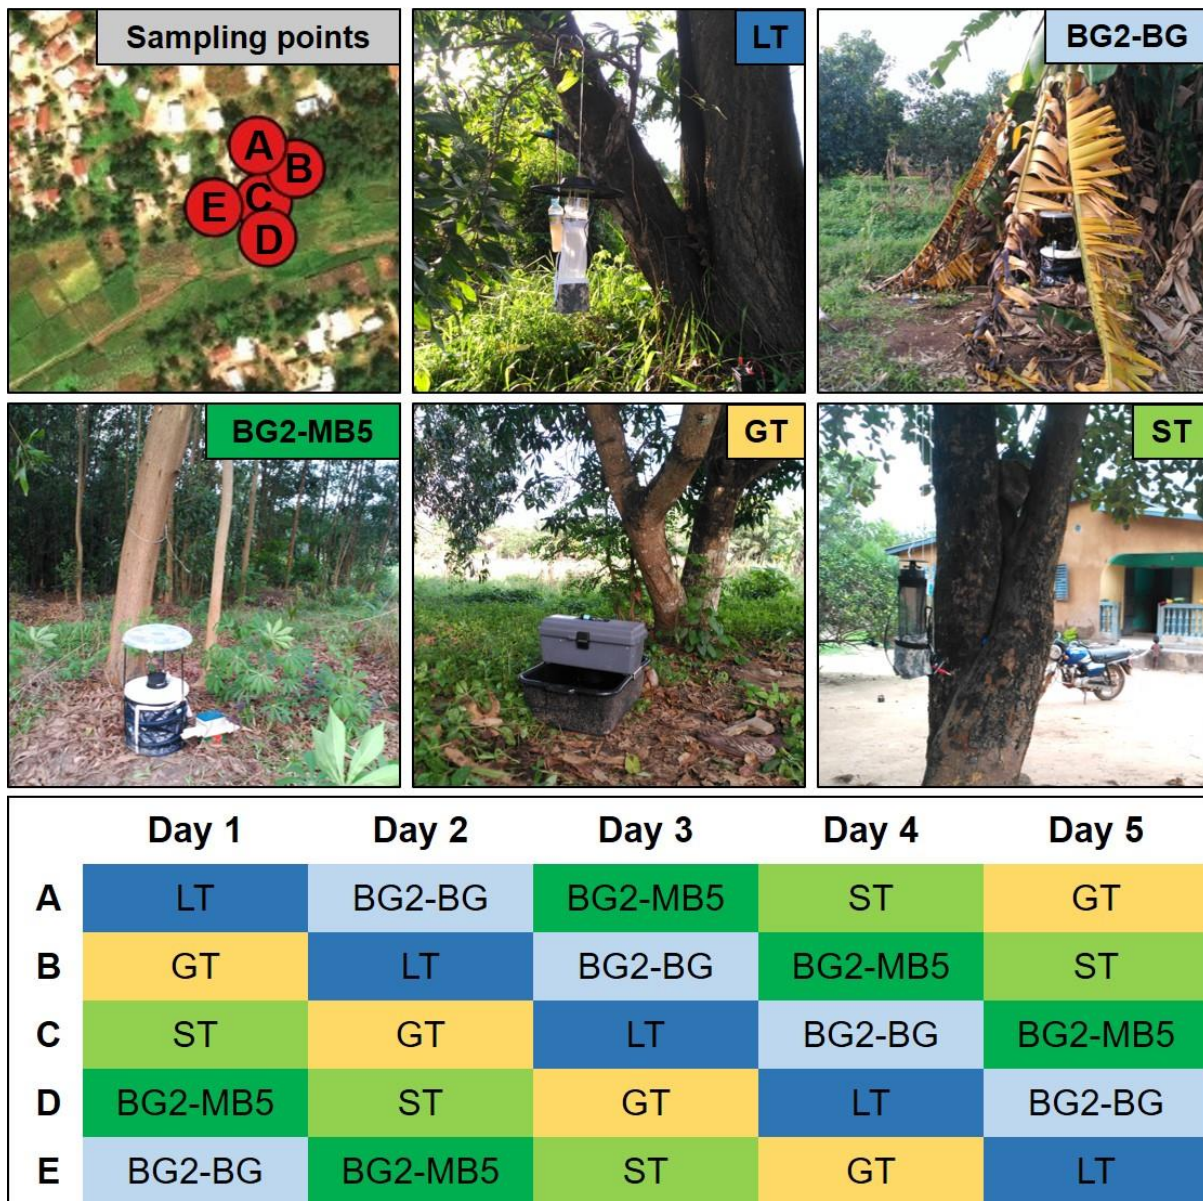

761

762 **Figure 2.** Example of distribution of traps in 5 sampling points in a 5x5 Latin Square design, in this  
 763 case in Maferinyah Centre One, and the schedule for 5 days of collection. LT. CDC light trap. BG2-  
 764 BG. BG sentinel 2 with BG lure, BG2-MB5. BG sentinel 2 with MB5 lure, GT. Gravid trap, ST. Stealth  
 765 trap.

766

767

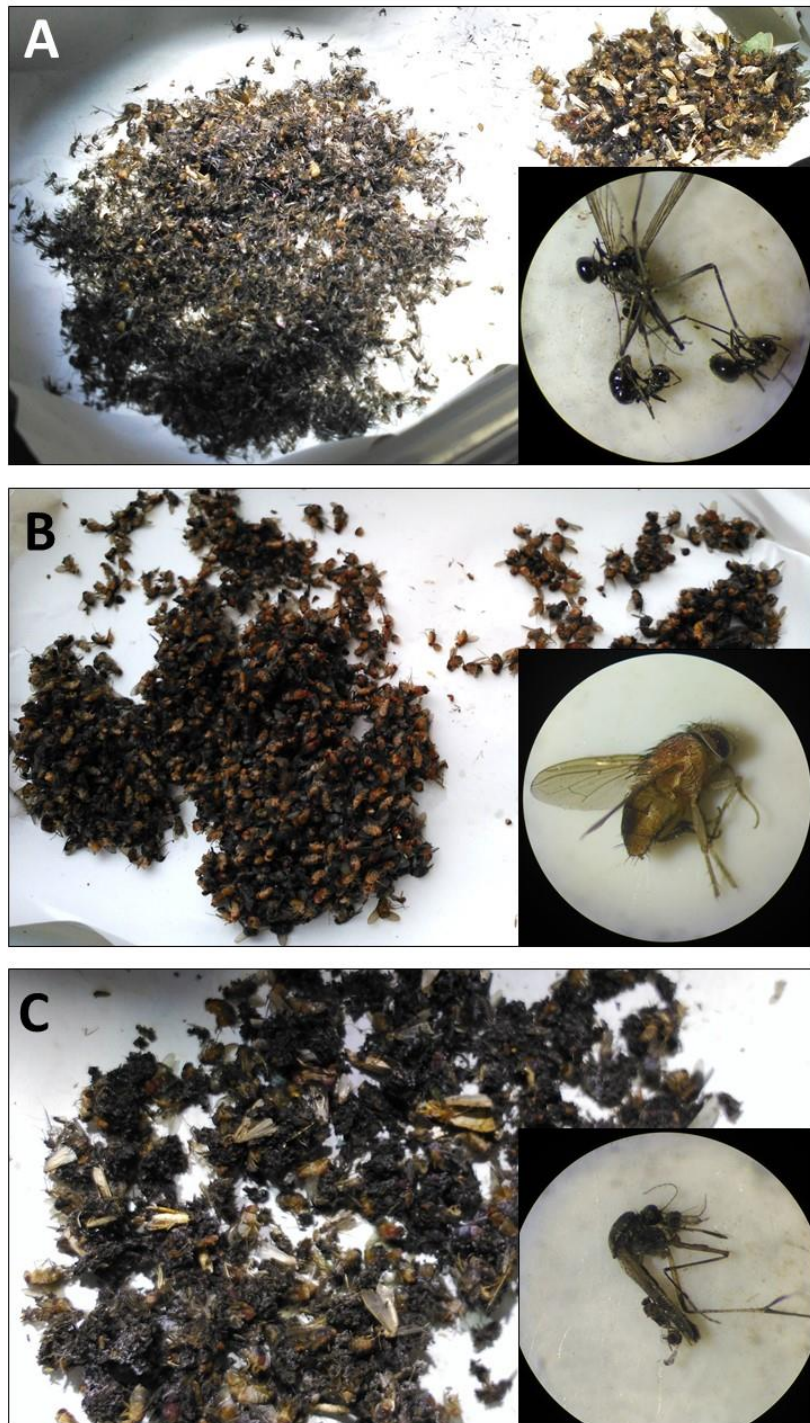

768

769 **Figure 3.** Examples of 12-hour collections of the ST. A. The largest collection of the study, showing a  
770 bigger group (left) containing a majority of mosquitoes and a smaller group (right) with unidentified  
771 Diptera and other insects already sorted. In this collection and others, some mosquitoes were being  
772 eaten by ants. B. Collection with the largest number of unidentified Diptera, which mask the presence  
773 of mosquitoes, also abundant. C. Collection with the largest number of damaged mosquitoes, which  
774 were wet and stuck to each other and to small unidentified Diptera.



Adult mosquito traps (n=236)

Human Landing Catches (n=86)

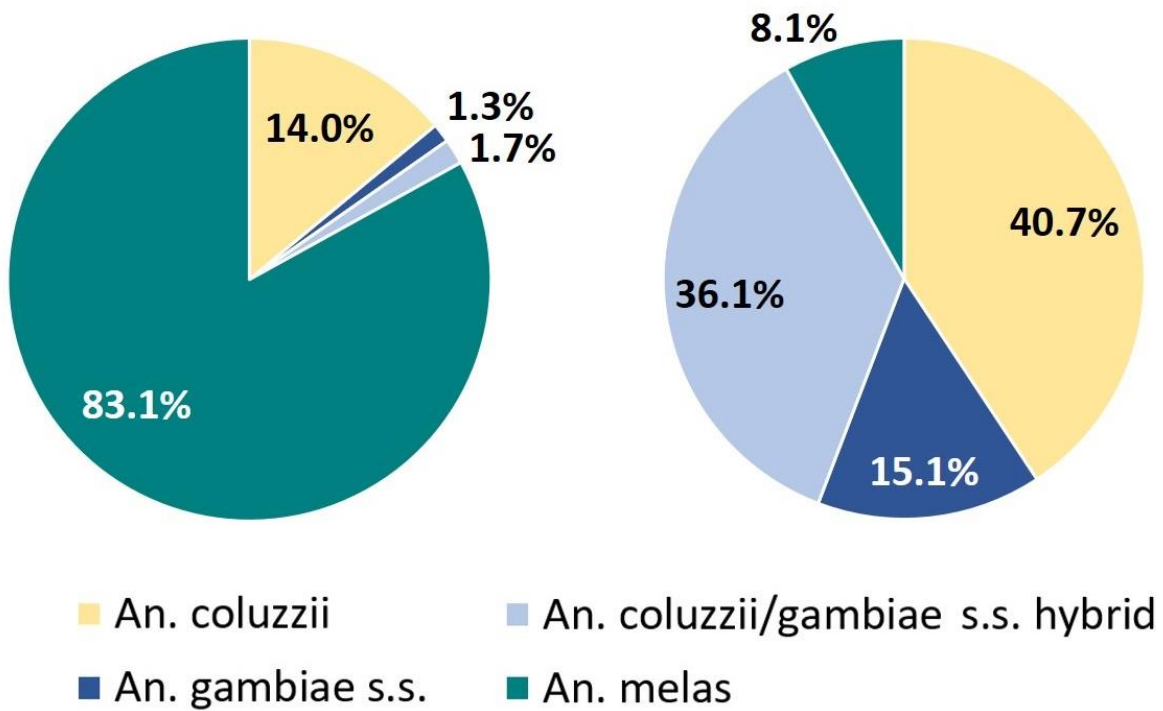

775

776

777 **Figure 4.** Comparison of species from the *Anopheles gambiae* complex captured by adult mosquito

778 traps (left) and HLCs (right).

779

780

781

782

783

784

785

786

787

788

789

790

791

792

793

794

795

796

797

798  
799  
800  
801  
802  
803  
804  
805  
806  
807  
808  
809  
810  
811  
812  
813  
814  
815  
816  
817  
818  
819  
820  
  
821  
822  
823  
824  
825  
826  
827  
828  
829  
830  
831  
832  
833  
834  
835  
836  
837  
838  
839  
840  
841  
842  
843  
844  
845  
846

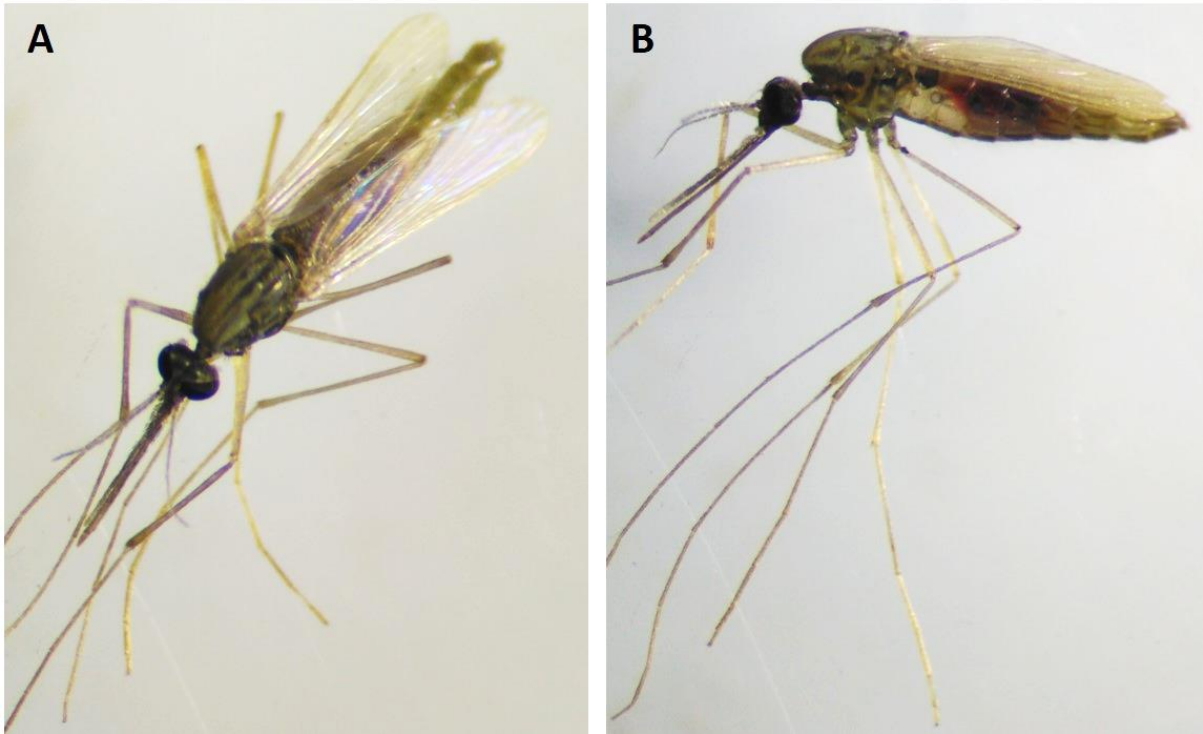

**Figure 5.** Golden *Anopheles* female mosquito. Specimen morphologically identified as *Anopheles* spp. and confirmed using PCR and sequencing as *An. coluzzii* from top (A) and lateral (B) view.

847 **TABLES**  
848

849 **Table 1.** Diversity and relative abundance of mosquitoes by trap. The number of mosquitoes from each  
850 genus is split into sex (male, female, unknown) and female (F) status (bloodfed, gravid, unfed,  
851 unknown). An unknown sex or status is caused by significant damage of the specimen. The subtotals  
852 show the proportion of each genus in relation with the total number of mosquitoes collected within each  
853 trap. Simpson's diversity index indicates a high diversity when it is close to 0 and low diversity when it  
854 is close to 1.

|                                    |                  | BG sentinel<br>BG lure | BG sentinel<br>MB5 lure | CDC light<br>trap | Gravid trap | Stealth trap |
|------------------------------------|------------------|------------------------|-------------------------|-------------------|-------------|--------------|
| <b>Aedes</b>                       | Bloodfed F       | 0                      | 5                       | 18                | 0           | 4            |
|                                    | Gravid F         | 20                     | 20                      | 161               | 18          | 25           |
|                                    | Unfed F          | 46                     | 28                      | 3                 | 17          | 374          |
|                                    | Unknown F status | 0                      | 0                       | 0                 | 0           | 6            |
|                                    | Male             | 12                     | 8                       | 72                | 1           | 63           |
|                                    | Unknown sex      | 1                      | 0                       | 2                 | 0           | 1            |
|                                    | Subtotal [%]     | 79 [36.92]             | 61 [13.29]              | 256 [10.05]       | 36 [12.2]   | 473 [6.67]   |
| <b>Anopheles</b>                   | Bloodfed F       | 1                      | 7                       | 3                 | 0           | 4            |
|                                    | Gravid F         | 0                      | 17                      | 1                 | 4           | 1            |
|                                    | Unfed F          | 47                     | 78                      | 81                | 6           | 198          |
|                                    | Unknown F status | 0                      | 0                       | 2                 | 0           | 5            |
|                                    | Male             | 1                      | 7                       | 7                 | 8           | 45           |
|                                    | Unknown sex      | 2                      | 1                       | 0                 | 0           | 2            |
|                                    | Subtotal [%]     | 51 [23.83]             | 110 [23.97]             | 94 [3.69]         | 18 [6.1]    | 255 [3.59]   |
| <b>Culex</b>                       | Bloodfed F       | 1                      | 2                       | 13                | 5           | 21           |
|                                    | Gravid F         | 7                      | 34                      | 172               | 105         | 327          |
|                                    | Unfed F          | 56                     | 184                     | 1089              | 77          | 3165         |
|                                    | Unknown F status | 0                      | 0                       | 23                | 0           | 187          |
|                                    | Male             | 18                     | 63                      | 888               | 54          | 2586         |
|                                    | Unknown sex      | 0                      | 0                       | 2                 | 0           | 9            |
|                                    | Subtotal [%]     | 82 [38.32]             | 283 [61.66]             | 2187 [85.9]       | 241 [81.69] | 6295 [88.71] |
| <b>Unidentified<br/>Culicines</b>  | Gravid F         | 0                      | 0                       | 1                 | 0           | 1            |
|                                    | Unfed F          | 1                      | 0                       | 2                 | 0           | 17           |
|                                    | Unknown F status | 0                      | 0                       | 0                 | 0           | 10           |
|                                    | Male             | 0                      | 3                       | 4                 | 0           | 21           |
|                                    | Unknown sex      | 0                      | 0                       | 0                 | 0           | 1            |
|                                    | Subtotal [%]     | 1 [0.47]               | 3 [0.65]                | 7 [0.27]          | 0           | 50 [0.7]     |
| <b>Eretmapodites</b>               | Gravid F         | 1 [0.47]               | 0                       | 0                 | 0           | 0            |
| <b>Mansonia</b>                    | Unfed F          | 0                      | 2 [0.44]                | 0                 | 0           | 0            |
| <b>Uranotaenia</b>                 | Unfed F          | 0                      | 0                       | 2 [0.08]          | 0           | 1 [0.02]     |
| <b>Unidentified<br/>specimens</b>  | Unknown sex      | 0                      | 0                       | 0                 | 0           | 22 [0.31]    |
| <b>Number of mosquitoes</b>        |                  | 214                    | 459                     | 2546              | 295         | 7096         |
| <b>Number of different species</b> |                  | 12                     | 14                      | 14                | 13          | 19           |
| <b>Simpson's diversity index</b>   |                  | 0.157                  | 0.24                    | 0.415             | 0.241       | 0.484        |



855 **Table 2.** Species captured per trap, site and collection period. A. Table showing mosquito species  
 856 collected by the five different adult mosquito traps. B. Table showing mosquito species collected in  
 857 Fandie, Maferinyah Centre One and Senguelen. C. Table showing mosquito species collected during  
 858 the 15 days and 15 nights of the study.

| <b>A</b>                 |                           |                                                                                                                                                                                                                                                                                                                                                                                                                                                                                                                                                                                                                           |
|--------------------------|---------------------------|---------------------------------------------------------------------------------------------------------------------------------------------------------------------------------------------------------------------------------------------------------------------------------------------------------------------------------------------------------------------------------------------------------------------------------------------------------------------------------------------------------------------------------------------------------------------------------------------------------------------------|
| <b>Trap</b>              | BG sentinel<br>2 BG lure  | <i>Ae. aegypti</i> , <i>Ae. argenteopunctatus</i> , <i>Ae. cumminsi</i> , <i>Ae. cf. luteocephalus</i> ,<br><i>Ae. simpsoni</i> s.l., <i>An. coluzzii</i> , <i>An. gambiae</i> s.s., <i>An. melas</i> , <i>Cx. pipiens</i> ,<br><i>Cx. quinquefasciatus</i> , <i>Cx. cf. sitiens</i> , <i>Er. intermedius</i> .                                                                                                                                                                                                                                                                                                           |
|                          | BG sentinel<br>2 MB5 lure | <i>Ae. aegypti</i> , <i>Ae. argenteopunctatus</i> , <i>Ae. simpsoni</i> s.l., <i>Ae. cumminsi</i> , <i>Ae. cf. luteocephalus</i> , <i>An. coluzzii</i> , <i>An. gambiae</i> s.s., <i>An. gambiae/coluzzii</i> hybrid,<br><i>An. melas</i> , <i>Cx. pipiens</i> , <i>Cx. quinquefasciatus</i> , <i>Cx. cf. sitiens</i> , <i>Cx. watti</i> ,<br><i>Mansonia</i> spp.                                                                                                                                                                                                                                                        |
|                          | CDC light<br>trap         | <i>Ae. aegypti</i> , <i>Ae. argenteopunctatus</i> , <i>Ae. simpsoni</i> s.l., <i>Ae. cumminsi</i> , <i>An. coluzzii</i> , <i>An. coustani</i> s.l., <i>An. melas</i> , <i>An. squamosus</i> , <i>Cx. pipiens</i> , <i>Cx. quinquefasciatus</i> , <i>Cx. cf. sitiens</i> , <i>Lt. tigripes</i> , <i>Cx. watti</i> , <i>Uranotaenia</i> spp.                                                                                                                                                                                                                                                                                |
|                          | Gravid trap               | <i>Ae. aegypti</i> , <i>Ae. cumminsi</i> , <i>Ae. cf. denderensis</i> , <i>Ae. cf. luteocephalus</i> , <i>Ae. simpsoni</i> s.l., <i>An. coluzzii</i> , <i>An. melas</i> , <i>An. squamosus</i> , <i>Cx. pipiens</i> , <i>Cx. quinquefasciatus</i> , <i>Cx. cf. sitiens</i> , <i>Cx. cf. watti</i> , <i>Cx. watti</i> .                                                                                                                                                                                                                                                                                                    |
|                          | Stealth trap              | <i>Ae. aegypti</i> , <i>Ae. argenteopunctatus</i> , <i>Ae. cumminsi</i> , <i>Ae. fowleri</i> , <i>Ae. vittatus</i> ,<br><i>An. coluzzii</i> , <i>An. coustani</i> s.l., <i>An. gambiae</i> s.s., <i>An. gambiae/coluzzii</i><br>hybrid, <i>An. melas</i> , <i>An. obscurus</i> , <i>An. squamosus</i> , <i>Cx. pipiens</i> , <i>Cx. pipiens/quinquefasciatus</i> hybrid, <i>Cx. quinquefasciatus</i> , <i>Cx. cf. sitiens</i> , <i>Lt. tigripes</i> , <i>Cx. watti</i> , <i>Uranotaenia</i> spp.                                                                                                                          |
| <b>B</b>                 |                           |                                                                                                                                                                                                                                                                                                                                                                                                                                                                                                                                                                                                                           |
| <b>Site</b>              | Fandie                    | <i>Ae. aegypti</i> , <i>Ae. argenteopunctatus</i> , <i>Ae. cumminsi</i> , <i>Ae. cf. denderensis</i> , <i>Ae. cf. luteocephalus</i> , <i>Ae. simpsoni</i> s.l., <i>An. coluzzii</i> , <i>An. coustani</i> s.l., <i>An. gambiae</i> s.s., <i>An. gambiae/coluzzii</i> hybrid, <i>An. melas</i> , <i>Cx. pipiens</i> , <i>Cx. quinquefasciatus</i> , <i>Cx. cf. sitiens</i> , <i>Lt. tigripes</i> , <i>Uranotaenia</i> spp.                                                                                                                                                                                                 |
|                          | Maferinyah<br>Centre One  | <i>Ae. aegypti</i> , <i>Ae. cumminsi</i> , <i>Ae. fowleri</i> , <i>Ae. cf. luteocephalus</i> , <i>Ae. simpsoni</i> s.l., <i>Ae. vittatus</i> , <i>An. coluzzii</i> , <i>An. coustani</i> s.l., <i>An. gambiae</i> s.s., <i>An. melas</i> , <i>An. squamosus</i> , <i>Cx. pipiens</i> , <i>Cx. pipiens/quinquefasciatus</i> hybrid, <i>Cx. quinquefasciatus</i> , <i>Cx. cf. sitiens</i> , <i>Cx. cf. watti</i> , <i>Cx. watti</i> .                                                                                                                                                                                       |
|                          | Senguelen                 | <i>Ae. aegypti</i> , <i>Ae. argenteopunctatus</i> , <i>Ae. cumminsi</i> , <i>Ae. cf. luteocephalus</i> ,<br><i>Ae. simpsoni</i> s.l., <i>An. coluzzii</i> , <i>An. coustani</i> s.l., <i>An. gambiae</i> s.s., <i>An. gambiae/coluzzii</i> hybrid, <i>An. melas</i> , <i>An. obscurus</i> , <i>An. squamosus</i> , <i>Cx. pipiens</i> , <i>Cx. quinquefasciatus</i> , <i>Cx. cf. sitiens</i> , <i>Lt. tigripes</i> , <i>Cx. watti</i> , <i>Er. intermedius</i> , <i>Mansonia</i> spp.                                                                                                                                     |
| <b>C</b>                 |                           |                                                                                                                                                                                                                                                                                                                                                                                                                                                                                                                                                                                                                           |
| <b>Collection period</b> | Day                       | <i>Ae. aegypti</i> , <i>Ae. cumminsi</i> , <i>Ae. cf. denderensis</i> , <i>Ae. cf. luteocephalus</i> , <i>Ae. simpsoni</i> s.l., <i>An. coluzzii</i> , <i>An. melas</i> , <i>Cx. pipiens</i> , <i>Cx. quinquefasciatus</i> , <i>Cx. cf. sitiens</i> , <i>Lt. tigripes</i> , <i>Cx. watti</i> .                                                                                                                                                                                                                                                                                                                            |
|                          | Night                     | <i>Ae. aegypti</i> , <i>Ae. argenteopunctatus</i> , <i>Ae. simpsoni</i> s.l., <i>Ae. cumminsi</i> , <i>Ae. fowleri</i> , <i>Ae. cf. luteocephalus</i> , <i>Ae. vittatus</i> , <i>An. coluzzii</i> , <i>An. coustani</i> s.l., <i>An. gambiae</i> s.s., <i>An. gambiae/coluzzii</i> hybrid, <i>An. melas</i> , <i>An. obscurus</i> , <i>An. squamosus</i> , <i>Cx. pipiens</i> , <i>Cx. pipiens/quinquefasciatus</i> hybrid, <i>Cx. quinquefasciatus</i> , <i>Cx. cf. sitiens</i> , <i>Cx. cf. watti</i> , <i>Lt. tigripes</i> , <i>Cx. watti</i> , <i>Er. intermedius</i> , <i>Mansonia</i> spp., <i>Uranotaenia</i> spp. |

859

860

861

862

863

864

865

866 **Table 3.** Statistical differences between the abundance of *Anopheles*, *Aedes* and *Culex* genera and  
 867 *An. gambiae* s.l. and *Ae. aegypti* mosquitoes captured by the five traps. The table shows the mean  
 868 number (and 95% confidence interval) of mosquitoes captured per collection interval per trap. The  
 869 values in each row are significantly different from each other if they do not share the same superscript  
 870 letter.

871

|                                      | BG sentinel<br>BG lure              | BG sentinel<br>MB5 lure             | CDC light trap                        | Gravid trap                        | Stealth trap                            |
|--------------------------------------|-------------------------------------|-------------------------------------|---------------------------------------|------------------------------------|-----------------------------------------|
| <b><i>Anopheles gambiae</i> s.l.</b> | 1.70 <sup>ab</sup><br>(0.7 – 2.7)   | 3.57 <sup>ab</sup><br>(1.96 – 5.17) | 2.63 <sup>ab</sup><br>(1.06 – 4.21)   | 0.53 <sup>b</sup><br>(0.04 – 1.03) | 7.93 <sup>a</sup><br>(5.26 – 10.61)     |
| <b><i>Aedes aegypti</i></b>          | 1.13 <sup>a</sup><br>(0.53 – 1.74)  | 1.23 <sup>a</sup><br>(0.68 – 1.79)  | 0.23 <sup>b</sup><br>(-0.19 – 0.65)   | 0.37 <sup>ab</sup><br>(0 – 0.73)   | 0.10 <sup>b</sup><br>(-0.25 – 0.45)     |
| <b><i>Aedes</i> genus</b>            | 2.53 <sup>a</sup><br>(1.77 – 3.3)   | 2 <sup>a</sup><br>(1.52 – 2.48)     | 8.5 <sup>a</sup><br>(5.88 – 11.12)    | 1.13 <sup>a</sup><br>(0.73 – 1.54) | 15.73 <sup>a</sup><br>(10.77 – 20.7)    |
| <b><i>Anopheles</i> genus</b>        | 1.73 <sup>ab</sup><br>(0.68 – 2.79) | 3.67 <sup>ab</sup><br>(2.08 – 5.25) | 3.13 <sup>ab</sup><br>(1.62 – 4.65)   | 0.67 <sup>b</sup><br>(0.15 – 1.19) | 8.5 <sup>a</sup><br>(5.85 – 11.15)      |
| <b><i>Culex</i> genus</b>            | 2.87 <sup>c</sup><br>(1.61 – 4.12)  | 9.4 <sup>dc</sup><br>(6.57 – 12.23) | 72.93 <sup>b</sup><br>(68.15 – 77.72) | 8.7 <sup>bd</sup><br>(6.84 – 9.3)  | 209.87 <sup>a</sup><br>(200.6 – 219.14) |

872

873

874

875 **Table 4.** Diversity and relative abundance of mosquitoes per site and collection interval. Percentages  
 876 show the proportion of mosquitoes collected in each site (and collection interval) in relation with the  
 877 total number of mosquitoes. Simpson's diversity index indicates a high diversity when it is close to 0  
 878 and low diversity when it is close to 1.

879

| Site                         | Collection Period | Number of mosquitoes [%] | Number of different species | Simpson's diversity index |
|------------------------------|-------------------|--------------------------|-----------------------------|---------------------------|
| <b>Fandie</b>                | Night             | 4031 [38]                | 14                          | 0.48                      |
|                              | Day               | 63 [0.6]                 | 9                           | 0.142                     |
| <b>Maferinyah Centre One</b> | Night             | 690 [6.5]                | 17                          | 0.346                     |
|                              | Day               | 42 [0.4]                 | 5                           | 0.383                     |
| <b>Senguelen</b>             | Night             | 5256 [49.5]              | 19                          | 0.274                     |
|                              | Day               | 528 [5]                  | 10                          | 0.22                      |
| <b>Total</b>                 |                   | 10610                    | 25                          |                           |

880

881

882

883

884 **ADDITIONAL FILES**

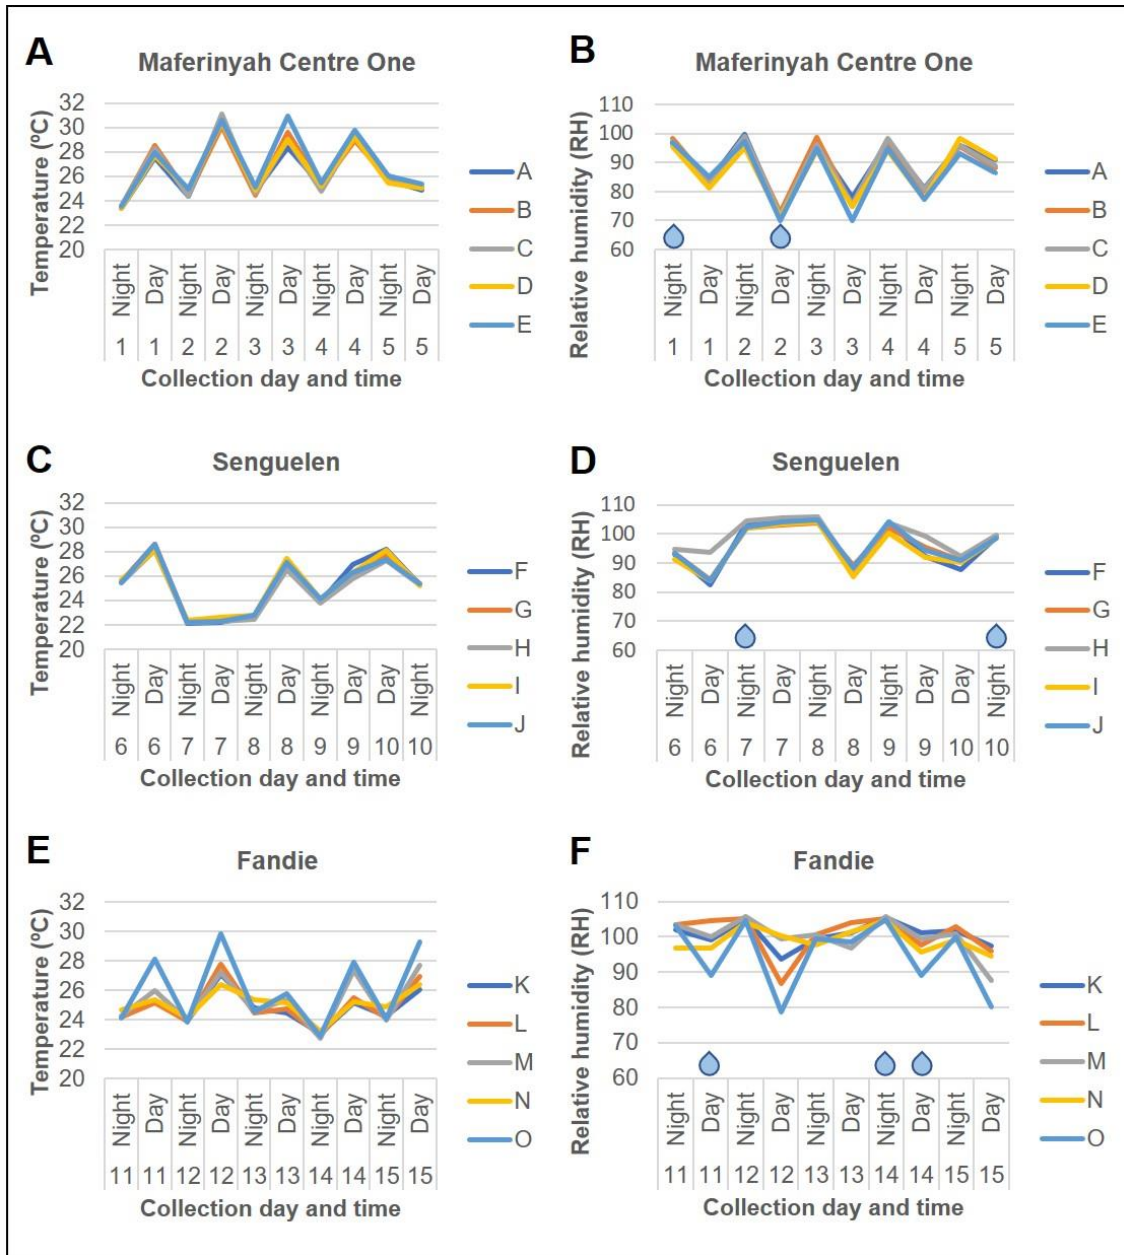

885

886 **Supplementary Figure S1.** Environmental data. Temperature (A, C, E), relative humidity (B, D, F) and  
 887 presence of rain (blue drops) in each study site are shown. Graphs represent the temperature and  
 888 relative humidity in each sampling point (A – E in Maferinyah Centre One, F – J in Senguelen and K –  
 889 O in Fandie) across 10 collection intervals (5 days and 5 nights) per site. Note that each interval starts  
 890 with a night collection followed by a day collection except day 10 in Senguelen, which starts with a day  
 891 collection due to an interval repetition.

892

893

894 **Table S1.** Coordinates and description of the sampling points in Maferinyah Centre One, Senguellen  
 895 and Fandie. Latitude and longitude were obtained using GPS (eTrex 10, Garmin).

| Site                                      | Point    | Latitude | Longitude  | Description                                                                                                                                        |
|-------------------------------------------|----------|----------|------------|----------------------------------------------------------------------------------------------------------------------------------------------------|
| <b>Maferinyah Centre One (semi-urban)</b> | <b>A</b> | 09.54650 | -013.28160 | Between crops, a rice field and a house. Likely hosts: humans.                                                                                     |
|                                           | <b>B</b> | 09.54646 | -013.28195 | Behind the house. Likely hosts: humans and goats.                                                                                                  |
|                                           | <b>C</b> | 09.54625 | -013.28157 | In the rice field, under a banana tree. Likely hosts: humans.                                                                                      |
|                                           | <b>D</b> | 09.54673 | -013.28137 | Far from the house, at the end of the crops. Likely hosts: humans.                                                                                 |
|                                           | <b>E</b> | 09.54689 | -013.28164 | In front of the house, cooking area. Likely hosts: humans, poultry and cats.                                                                       |
| <b>Senguellen (rural)</b>                 | <b>F</b> | 09.41150 | -013.37564 | Close to the road. Likely hosts: goats, chicken and humans.                                                                                        |
|                                           | <b>G</b> | 09.41117 | -013.37548 | Close to houses. Likely hosts: humans, chicken and goats.                                                                                          |
|                                           | <b>H</b> | 09.41113 | -013.37511 | Behind the toilet and close to the house. Likely hosts: humans, chicken and goats.                                                                 |
|                                           | <b>I</b> | 09.41192 | -013.37514 | Close to a house, under a banana tree. Likely hosts: humans, goats and chicken.                                                                    |
|                                           | <b>J</b> | 09.41183 | -013.37552 | The closest to breeding sites and salty water. Close to cooking and resting area, under a banana tree. Likely hosts: humans, goats and chicken.    |
| <b>Fandie (semi-rural)</b>                | <b>K</b> | 09.53047 | -013.24000 | Between the rice field and the house. Likely hosts: humans.                                                                                        |
|                                           | <b>L</b> | 09.53044 | -013.23956 | In a palm tree field, behind the house yard. Likely hosts: unknown.                                                                                |
|                                           | <b>M</b> | 09.53026 | -013.23894 | Close to a school (closed for holidays) and to the road. Next to a water container with stagnant water. Likely hosts: goats and occasionally cows. |
|                                           | <b>N</b> | 09.53084 | -013.23944 | Close to the house, the cooking area and animal shelter. Likely hosts: humans, chicken, goats and dogs.                                            |
|                                           | <b>O</b> | 09.53088 | -013.23889 | In the crops. Likely hosts: humans.                                                                                                                |

896  
 897  
 898  
 899  
 900  
 901  
 902  
 903  
 904  
 905  
 906  
 907

908 **Table S2.** PCR assays. Primers, final volumes and conditions of each PCR assay are shown.

| Gene target and reference                         | Components                                                                                                                                                     | Final volume | Conditions                                                                                               |
|---------------------------------------------------|----------------------------------------------------------------------------------------------------------------------------------------------------------------|--------------|----------------------------------------------------------------------------------------------------------|
| <b>ACE</b><br><b>Smith and Fonseca (34)</b>       | 10µL Taq MM 2X<br>0.2µM pipF (5'-GGAAACAACGACGTATGTA-3')<br>0.4µM quinF (5'-CCTTCTTGAATGGCTGTGGCA-3')<br>0.4µM B1246R (5'-TGGAGCCTCCTCTTCACGGC-3')<br>2µL gDNA | 20µL         | 95°C – 10'<br>95°C – 30"<br>55°C – 30"<br>72°C – 1'<br>72°C – 5'                                         |
| <b>ITS2</b><br><b>Beebe and Saul (32)</b>         | 10µL Taq MM 2X<br>1µM ITS2A (5'-TGTGAACTGCAGGACACAT-3')<br>1µM ITS2B (5'-TATGCTTAAATTCAGGGGGT-3')<br>2µL cDNA                                                  | 20µL         | 94°C – 5'<br>94°C – 1'<br>52°C – 1'<br>72°C – 2'<br>72°C – 5'                                            |
| <b>COI</b><br><b>Kumar et al. (33)</b>            | 10µL Taq MM 2X<br>1µM F (5'-GGATTTGGAAATTTGATTAGTTCCTT-3')<br>1µM R (5'-AAAAATTTTAATTCCAGTTGGAACAGC-3')<br>2µL cDNA                                            | 25µL         | 95°C – 30"<br>95°C – 30"<br>45°C – 1'<br>68°C – 1'<br>95°C – 30"<br>51°C – 1'<br>68°C – 1'<br>68°C – 5'  |
| <b>COI</b><br><b>Folmer et al. (35)</b>           | 10µL Taq MM 2X<br>1µM F (5'-GGTCAACAAATCATAAAGATATTGG-3')<br>1µM R (5'-TAACTTCAGGGTGACCAAAAAATCA-3')<br>2µL cDNA                                               | 20µL         | 95°C – 5'<br>95°C – 40"<br>45°C – 1'<br>72°C – 90"<br>95°C – 40"<br>51°C – 1'<br>72°C – 90"<br>72°C – 5' |
| <b>COI</b><br><b>Oshaghi et al. (31)</b>          | 10µL Taq MM 2X<br>1µM F (5'-GGTCAACAAATCATAAAGATATTGG-3')<br>1µM R (5'-TAACTTCAGGGTGACCAAAAAATCA-3')<br>2µL cDNA                                               | 20µL         | 94°C – 4'<br>94°C – 1'<br>55°C – 1'<br>72°C – 2'<br>72°C – 7'                                            |
| <b>SINE200</b><br><b>Santolamazza et al. (29)</b> | 10µL Taq MM 2X<br>1µM S200X6.1-F (5'-TCGCCTTAGACCTTGCGTTA-3')<br>1µM S200X6.1-R (5'-CGCTTCAAGAATTCGAGATAC-3')<br>2µL cDNA                                      | 20µL         | 94°C – 10'<br>94°C – 30"<br>54°C – 30"<br>72°C – 1'<br>72°C – 10'                                        |
| <b>IGS</b><br><b>Scott et al. (30)</b>            | 10µL Taq MM 2X<br>1µM UN-F (5'-GTGTGCCCTTCCTCGATGT-3')<br>1µM ME-R (5'-TGACCAACCCACTCCCTTGA-3')<br>0.5µM GA-R (5'-CTGGTTTGGTTCGGCACGTTT-3')<br>2µL cDNA        | 20µL         | 95°C – 10'<br>95°C – 30"<br>50°C – 30"<br>72°C – 30"<br>72°C – 5'                                        |

909

910

911

912

913

914 **Table S3.** Statistical differences between the abundance of mosquitoes captured by the five traps.  
 915 Table showing the results of the final Generalised Linear Mixed Model: Abundance ~ Trap + Site +  
 916 Time + (1|Point) + (1|Humidity) for the difference in the abundance of mosquitoes captured by the 5  
 917 traps.

| Trap comparison    | Estimate | SE     | Z value | P-value    |
|--------------------|----------|--------|---------|------------|
| BG2-MB5 vs. BG2-BG | 0.357    | 0.383  | 0.931   | 0.885      |
| LT vs. BG2-BG      | 1.361    | 0.383  | 3.55    | 0.003 **   |
| GT vs. BG2-BG      | 0.569    | 0.3828 | 1.487   | 0.571      |
| ST vs. BG2-BG      | 2.351    | 0.37   | 6.358   | <0.001 *** |
| LT vs. BG2-MB5     | 1.004    | 0.375  | 2.677   | 0.057 .    |
| GT vs. BG2-MB5     | 0.213    | 0.375  | 0.567   | 0.98       |
| ST vs. BG2-MB5     | 1.995    | 0.346  | 5.758   | <0.001 *** |
| GT vs. LT          | -0.792   | 0.376  | -2.107  | 0.216      |
| ST vs. LT          | 0.99     | 0.355  | 2.786   | 0.042 *    |
| ST vs. GT          | 1.782    | 0.361  | 4.933   | <0.001 *** |

918  
 919  
 920  
 921  
 922  
 923  
 924  
 925  
 926  
 927  
 928  
 929  
 930  
 931  
 932  
 933  
 934  
 935  
 936

937 **Table S4.** Mosquitoes used for molecular identification. Number and proportion of mosquitoes used  
 938 for molecular ID within each genus (A), each trap and each site (B).

|                              | <b>Genus</b>         | <b>Collected mosquitoes</b> | <b>Mosquitoes with molecular ID [%]</b> |
|------------------------------|----------------------|-----------------------------|-----------------------------------------|
|                              | <i>Anopheles</i>     | 528                         | 249 [47.15]                             |
|                              | <i>Aedes</i>         | 905                         | 24 [2.54]                               |
|                              | <i>Culex</i>         | 9088                        | 96 [1.03]                               |
|                              | <i>Eretmapodites</i> | 1                           | 1 [100]                                 |
|                              |                      |                             |                                         |
| <b>Site</b>                  | <b>Trap</b>          | <b>Collected mosquitoes</b> | <b>Mosquitoes with molecular ID [%]</b> |
| <b>Fandie</b>                | BG2 - BG             | 39                          | 13 [33.3]                               |
|                              | BG2 - MB5            | 13                          | 4 [30.77]                               |
|                              | CDC light trap       | 1238                        | 16 [1.29]                               |
|                              | Gravid trap          | 51                          | 3 [5.88]                                |
|                              | Stealth trap         | 2753                        | 20 [0.73]                               |
|                              | Subtotal [%]         | 4094                        | 56 [1.37]                               |
| <b>Maferinyah Centre One</b> | BG2 - BG             | 27                          | 3 [11.11]                               |
|                              | BG2 - MB5            | 70                          | 12 [17.14]                              |
|                              | CDC light trap       | 159                         | 8 [5.03]                                |
|                              | Gravid trap          | 157                         | 16 [10.19]                              |
|                              | Stealth trap         | 319                         | 23 [7.21]                               |
|                              | Subtotal [%]         | 732                         | 62 [8.47]                               |
| <b>Senguelen</b>             | BG2 - BG             | 148                         | 27 [18.24]                              |
|                              | BG2 - MB5            | 376                         | 77 [20.48]                              |
|                              | CDC light trap       | 1149                        | 31 [2.7]                                |
|                              | Gravid trap          | 87                          | 11 [12.64]                              |
|                              | Stealth trap         | 4024                        | 106 [2.63]                              |
|                              | Subtotal [%]         | 5784                        | 252 [4.36]                              |

939

940

941

942

943

944

945

946

947



948 **Table S5.** Species confirmed by molecular analysis. Sequencing, or a combination of sequencing and  
 949 species-specific end-point PCR were used to confirm species. A representative specimen from each  
 950 species is shown, with GenBank accession numbers for sequences generated in this study provided.  
 951 Where most significant BLAST alignments for query sequences gave maximum identities of 98% or  
 952 higher with a particular species, with no other species giving similar identities, or where species  
 953 diagnostic PCRs in combination with sequencing provided confirmation, that species is shown. Where  
 954 the most significant BLAST alignments gave identities below 98%, indicating the lack of comparative  
 955 sequences available for confirmation, or where distinction between closely related species wasn't  
 956 possible, cf. between the genus and species name denotes the most closely related species providing  
 957 the most significant BLAST alignment.

958

| Sample ID (isolate) | Species (or closest species) | Sampling location     | Collection method      | Gene fragment (reference)                         | GenBank accession number |
|---------------------|------------------------------|-----------------------|------------------------|---------------------------------------------------|--------------------------|
| FANP52.B3           | <i>An. coustani</i>          | Fandie                | CDC light trap         | ITS-2 (Beebe & Saul)                              |                          |
| MAFP2.D1            | <i>An. gambiae</i> s.s.      | Maferinyah Centre One | BG sentinel 2 MB5 lure | ITS-2 (Beebe & Saul)                              |                          |
| FANP43.B1 2         | <i>An. coluzzii</i>          | Fandie                | Gravid trap            | ITS-2 (Beebe & Saul)                              |                          |
| SENP14.H7           | <i>An. melas</i>             | Senguelen             | Gravid trap            | ITS-2 (Beebe & Saul)                              |                          |
| SENTY.Q             | <i>An. squamosus</i>         | Senguelen             | CDC light trap         | COI (Oshaghi <i>et al.</i> )                      |                          |
| FANP58.D9           | <i>Lt. tigripes</i>          | Fandie                | Stealth trap           | COI (Kumar <i>et al.</i> )                        |                          |
| MAFP6.C7            | <i>Cx. watti</i>             | Maferinyah Centre One | CDC light trap         | COI (Kumar <i>et al.</i> )                        |                          |
| MAFP5.A2            | <i>Cx. pipiens</i>           | Maferinyah Centre One | BG sentinel 2 MB5 lure | COI (Kumar <i>et al.</i> )                        |                          |
| MAFP4.A7            | <i>Cx. quinquefasciatus</i>  | Maferinyah Centre One | BG sentinel 2 MB5 lure | COI (Kumar <i>et al.</i> )                        |                          |
| MAFP5.C5            | <i>Cx. cf. watti</i>         | Maferinyah Centre One | Gravid trap            | COI (Kumar <i>et al.</i> )                        |                          |
| MAFP8.E9            | <i>Cx. cf. sitiens</i>       | Maferinyah Centre One | CDC light trap         | COI (Kumar <i>et al.</i> ; Folmer <i>et al.</i> ) |                          |
| MAFP4.A3            | <i>Ae. aegypti</i>           | Maferinyah Centre One | BG sentinel 2 MB5 lure | COI (Folmer <i>et al.</i> )                       |                          |
| MAFP7.F8            | <i>Ae. vittatus</i>          | Maferinyah Centre One | Stealth trap           | COI (Folmer <i>et al.</i> )                       |                          |
| MAFP7.G6            | <i>Ae. fowleri</i>           | Maferinyah Centre One | Stealth trap           | COI (Folmer <i>et al.</i> )                       |                          |
| FANP44.D1           | <i>Ae. cumminsi</i>          | Fandie                | BG sentinel 2 BG lure  | COI (Folmer <i>et al.</i> )                       |                          |
| FANP37.E8           | <i>Ae. argenteopunctatus</i> | Fandie                | Stealth trap           | COI (Folmer <i>et al.</i> )                       |                          |
| MAFP6.G8            | <i>Ae. cf. simpsoni</i>      | Maferinyah Centre One | BG sentinel 2 BG lure  | COI (Folmer <i>et al.</i> )                       |                          |
| SENP19.A2           | <i>Ae. cf. luteocephalus</i> | Senguelen             | Gravid trap            | COI (Folmer <i>et al.</i> )                       |                          |
| FANP37.H1 1         | <i>Ae. cf. denderensis</i>   | Fandie                | Gravid trap            | COI (Folmer <i>et al.</i> )                       |                          |
| SENP11.A3           | <i>Er. intermedius</i>       | Senguelen             | BG sentinel 2 BG lure  | COI (Folmer <i>et al.</i> )                       |                          |

959

960
